# Supplementary material for: Myocardial infarction incidence and survival by ethnic group: Scottish Health and Ethnicity Linkage retrospective cohort study
Source: PubMed Central journal article supplement — BMJ Open. 2013 Sep 13;3(9):e003415. doi: 10.1136/bmjopen-2013-003415 (PMC3773657; doi:10.1136/bmjopen-2013-003415), 2013-09-13
Supplement: bmjopen-2013-003415.draft_revisions.pdf [file bmjopen-2013-003415.draft_revisions.pdf]

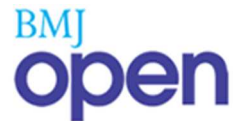

**Myocardial infarction incidence and survival by ethnic group: Scottish Health and Ethnicity Linkage retrospective cohort Study**

|                                 |                                                                                                                                                                                                                                                                                                                                                                                                                                                                                       |
|---------------------------------|---------------------------------------------------------------------------------------------------------------------------------------------------------------------------------------------------------------------------------------------------------------------------------------------------------------------------------------------------------------------------------------------------------------------------------------------------------------------------------------|
| Journal:                        | <i>BMJ Open</i>                                                                                                                                                                                                                                                                                                                                                                                                                                                                       |
| Manuscript ID:                  | bmjopen-2013-003415                                                                                                                                                                                                                                                                                                                                                                                                                                                                   |
| Article Type:                   | Research                                                                                                                                                                                                                                                                                                                                                                                                                                                                              |
| Date Submitted by the Author:   | 18-Jun-2013                                                                                                                                                                                                                                                                                                                                                                                                                                                                           |
| Complete List of Authors:       | Bansal, Narinder; University of Edinburgh, Population Health Sciences<br>Fischbacher, Colin; NHS National Services Scotland, Information Services Division<br>Bhopal, Raj; University of Edinburgh, Centre for Population Health Sciences<br>Brown, Helen; University of Edinburgh, Centre for Population Health Sciences<br>Steiner, Markus; University of Edinburgh, Centre for Population Health Sciences<br>Capewell, Simon; University of Liverpool, Department of Public Health |
| <b>Primary Subject Heading</b>: | Epidemiology                                                                                                                                                                                                                                                                                                                                                                                                                                                                          |
| Secondary Subject Heading:      | Cardiovascular medicine                                                                                                                                                                                                                                                                                                                                                                                                                                                               |
| Keywords:                       | Hypertension < CARDIOLOGY, EPIDEMIOLOGY, PUBLIC HEALTH                                                                                                                                                                                                                                                                                                                                                                                                                                |
|                                 |                                                                                                                                                                                                                                                                                                                                                                                                                                                                                       |

SCHOLARONE™  
Manuscripts

only

1  
2  
3 **Manuscript title:** Myocardial infarction incidence and survival by ethnic group: Scottish  
4  
5 Health and Ethnicity Linkage retrospective cohort Study  
6  
7

8  
9 **Authors and affiliations:**

10  
11 Narinder Bansal<sup>1</sup>, Colin M Fischbacher<sup>2</sup>, Raj S Bhopal<sup>1</sup>, Helen Brown<sup>1</sup>, Markus FC Steiner<sup>1</sup>,  
12  
13 Simon Capewell<sup>3</sup>, on behalf of the Scottish Health and Ethnicity Linkage Study  
14  
15

16  
17  
18 <sup>1</sup>Public Health Sciences, Centre for Population Health Studies, University of Edinburgh,  
19  
20 Teviot Place, Edinburgh EH8 9AG, Narinder Bansal Research Fellow, Raj S Bhopal Bruce  
21  
22 and John Usher Professor of Public Health, Helen Brown Senior Statistician, Markus FC  
23  
24 Steiner Clinical Research Fellow  
25  
26

27 <sup>2</sup>Information Services Division, NHS Scotland National Services, Gyle Square, 1 South Gyle  
28  
29 Crescent, Edinburgh EH12 9EB, Colin M Fischbacher Public Health Consultant  
30  
31

32 <sup>3</sup>Division of Public Health, University of Liverpool, Whelan Building, Quadrangle,  
33  
34 Liverpool, L69 3GB, Simon Capewell Professor of Clinical Epidemiology  
35  
36

37  
38 **Corresponding to:** Dr Colin M Fischbacher ([Colin.Fischbacher@nhs.net](mailto:Colin.Fischbacher@nhs.net))  
39  
40

41  
42 **Text word count:** 4004  
43  
44  
45  
46  
47  
48  
49  
50  
51  
52  
53  
54  
55  
56  
57  
58  
59  
60

## Abstract

### Objective

Inequalities in coronary heart disease mortality by country of birth are large and poorly understood. However, these data misclassify UK born minority ethnic groups and provide little detail on whether excess risk is due to increased incidence, poorer survival or both.

### Design

Retrospective cohort study

### Setting

General resident population of Scotland.

### Participants

All those resident in Scotland during the 2001 Census were eligible for inclusion: 2,972,120 people were included in the analysis. The number resident in Scotland at the end of the study in 2008 is not known.

### Primary and secondary outcome measures

As specified in the analysis plan, the primary outcome measures were first occurrence of admission or death due to myocardial infarction and time to event. There were no secondary outcome measures.

### Results

AMI incidence risk ratios [95% confidence intervals] relative to White Scottish populations (100) were highest amongst Pakistani men (164.1 [142.2 to 189.2]) and women (153.7 [120.5, 196.1]) and lowest for men and women of Chinese (39.5 [27.1 to 57.6] and 59.1 [38.6 to 90.7]), Other White British (77 [74.2 to 79.8] and 72.2 [69.0 to 75.5]) and Other White (83.1 [75.9 to 91.0] and 79.9 [71.5 to 89.3]) ethnic groups. Adjustment for educational qualification did not remove these differences. Cardiac intervention uptake was similar across most ethnic groups. Compared to White Scottish, 28-day survival did not differ by ethnicity,

1  
2  
3 except in Pakistanis where it was better, particularly in women (0.44 [0.25 to 0.78]), a  
4  
5 difference not removed by adjustment for education, travel time to hospital or cardiac  
6  
7 intervention uptake.  
8

### 9 **Conclusions**

10  
11 Pakistanis have the highest incidence of AMI in Scotland, a country renowned for  
12  
13 internationally high CVD rates. In contrast, survival is similar or better in minority ethnic  
14  
15 groups. Clinical care and policy should focus on reducing incidence among Pakistanis  
16  
17 through more aggressive prevention.  
18  
19  
20  
21  
22  
23  
24  
25  
26  
27  
28  
29  
30  
31  
32  
33  
34  
35  
36  
37  
38  
39  
40  
41  
42  
43  
44  
45  
46  
47  
48  
49  
50  
51  
52  
53  
54  
55  
56  
57  
58  
59  
60

1  
2  
3 Article summary  
4

5 Article focus  
6

- 7 - Expand on and test hypotheses generated by phase 1 work by establishing risk status  
8 for each ethnic group in relation to the White Scottish  
9  
10  
11 - Compare risk of MI incidence between White subgroups (White Scottish with the  
12 Other White British, White Irish and Other White groups) in Scotland  
13  
14  
15 - Assess whether ethnic variations in survival are explained by differences in procedure  
16 use and proximity to hospital  
17  
18  
19

20 Key messages  
21

- 22  
23 • Using ethnicity (rather than its proxy country of birth) reveals exceptionally high rates  
24 of myocardial infarction in Pakistanis in Scotland  
25  
26  
27 • Ethnic variations in incidence and not case fatality underlie these ethnic variations  
28  
29  
30 • Pakistani women in particular have lower MI case fatality than White Scottish women  
31  
32  
33 • Chinese populations had exceptionally low rates of MI  
34  
35  
36 • Scottish men and women have a higher risk of MI compared to other non-Scottish  
37 White groups, particularly Other White British, a difference not removed by  
38 adjustment for education.  
39  
40  
41  
42

43 Strengths and limitations  
44

- 45 - The strengths include the overall size (4.65 million people), the availability of an  
46 ethnic code completed by the householder on behalf of the household or by  
47 individuals; information on a wide range of ethnic groups; the linkage of census data  
48 to both hospital morbidity and community/hospital mortality so that differences in  
49 hospitalisation do not just reflect community mortality; and the linkage of travel time  
50 data. Audits show high completeness (99%) and quality (94% diagnostic coding  
51  
52  
53  
54  
55  
56  
57  
58  
59  
60

1  
2  
3 accuracy) of the SMR01 file for CHD diagnoses. All deaths are certified by a doctor in  
4  
5 Scotland and all public hospitals are required to submit data. The private hospital  
6  
7 sector is small in Scotland. The validity of available indicators of socio-economic  
8  
9 position is not yet established in multi-ethnic studies. These data break new ground in  
10  
11 Europe, both in terms of findings and in linkage methods.  
12  
13

- 14  
15  
16 - The weaknesses of the study include the small population size for some non-White  
17  
18 populations and therefore small number of events and imprecision of estimates as well  
19  
20 as aggregation of data for heterogeneous ethnic groups such as African and Caribbean;  
21  
22 the inability to capture events that may have occurred outside the UK; the  
23  
24 unavailability of linkable CVD risk factor data; the unavailability of reliable diabetes  
25  
26 data from SMR01 records; and the unavailability of data on AMI stage and severity  
27  
28 and time to treatment.  
29  
30  
31  
32  
33  
34  
35  
36  
37  
38  
39  
40  
41  
42  
43  
44  
45  
46  
47  
48  
49  
50  
51  
52  
53  
54  
55  
56  
57  
58  
59  
60

Text

## Introduction

Coronary Heart Disease (CHD) dominates as the leading cause of premature mortality worldwide <sup>1</sup> and has been shown to vary by country of birth in Europe and North America <sup>2;3</sup>. Residents of England and Wales born in the Indian subcontinent (South Asians) for example, have higher mortality from CHD than most other minority ethnic groups, including people of European ancestry <sup>4</sup>, a pattern seen globally <sup>2;3;5</sup>. Such findings are surprising given the high rates of disease in Northern Europe. In Scotland, where CHD is notoriously common, there were small differences in CHD mortality between those born in Scotland and those born in India and Pakistan, reflecting the high rate in the Scotland born reference population <sup>6</sup>. Estimates of ethnic variations in risk are usually based on country of birth and mortality rates. However, the increase in the locally born minority ethnic populations, and the fact that large numbers of older White people may be born abroad e.g., in India during colonial times, makes country of birth an inaccurate guide to ethnic group variations, particularly in the youngest and oldest age groups. Further, whether mortality variations are attributable to increased incidence, poorer survival, or both, is a little researched topic <sup>7</sup>. This is a weakness of most of the available research.

Ethnicity data is needed to determine best treatment strategies and assess the overall health of ethnically diverse populations. Internationally, the need for data on the health of minority ethnic and racial groups is driven by policy and legislation responding to rapidly increasing ethnic diversity <sup>8</sup>. These needs require national datasets covering the major diseases of which circulatory disorders are invariably dominant.

1  
2  
3 Our retrospective Scottish Health and Ethnicity Linkage Study (SHELS) uses linked data to  
4 investigate ethnic variations in health <sup>9</sup>. We reported from a pilot (phase 1) project on the  
5 incidence of hospitalisation or death (in hospital or community) from acute myocardial  
6 infarction (AMI) and subsequent survival (from April 2001 to December 2003) in South  
7 Asians (there were insufficient numbers to disaggregate as Indians, Pakistanis and  
8 Bangladeshis). We found a 45% and 85% higher incidence of AMI in South Asian men and  
9 women, respectively, but better survival (hazard ratio 0.59) compared to non-South Asians <sup>7</sup>.

10  
11  
12  
13  
14  
15  
16  
17  
18  
19  
20 Expanding on our pilot, we now present data from phase 2 of our study on first AMI  
21 incidence and survival comparing ethnic groups in Scotland as defined by the 2001 Scottish  
22 Census categories. The aims of these analyses were to expand on and test hypotheses  
23 generated by phase 1 work by establishing risk status for each ethnic group in relation to the  
24 White Scottish. Particularly, we examined whether the heterogeneity in cardiovascular risk  
25 previously demonstrated within South Asian groups (Indian and Pakistani) <sup>4;10;11</sup> is reflected  
26 in MI incidence and survival in Scotland. Secondly, given that Scottish migrants to England  
27 have comparatively high CHD relative to English born populations, we aimed to compare the  
28 White Scottish with the Other White British, White Irish and Other White groups in Scotland.  
29 Thirdly, we aimed to assess whether ethnic variations in survival are explained by differences  
30 in procedure use and proximity to hospital. Our prior hypotheses were that Indians and  
31 Pakistanis would have the highest, and Chinese the lowest, incidence of first AMI compared  
32 to the White Scottish population and that the better survival in South Asians demonstrated in  
33 phase 1 could be explained by decreased travel time to hospital. In the absence of local data  
34 on uptake of procedures by ethnic groups, we hypothesised from first principles based on  
35 previous research that minority ethnic groups would have a relatively decreased uptake of  
36 cardiac interventions <sup>12</sup>.



## Methods

Details of the methods have been published<sup>7;9;13</sup>. An anonymised dataset containing 2001 census (self-defined ethnicity and socio-demographic variables) and health data (hospital day case and inpatient discharge data and linked records of deaths in and out of hospital) was created using the probability linkage method. This created a file with the unique census identifier and the Scottish Community Health Index number (a national register of patients using the NHS). This file was used to link to hospital discharge/deaths data held in the Scottish Morbidity Record (SMR01) database. Approximately 95% of the 2001 Census population of 4.9 million was linked to health records overall (4.65 million, with 85% or more linked in every ethnic group).

This analysis was restricted to people  $\geq 30$  years of age in April 2001, with a diagnosis of, or death (in or out of hospital) from, AMI between 1<sup>st</sup> May 2001 to 30<sup>th</sup> April 2008, and with no previous AMI recorded in the SMR01 database in the 10 years prior to the index event. AMI was identified using the International Classification of Diseases (ICD) 10<sup>th</sup> edition codes I21 and I22 (and using ICD 9<sup>th</sup> edition code 410 for the look-back period).

One category is selected by Census respondents from a list of 14 categories in response to the question “What is your ethnic group?” The category labels are self-explanatory. Due to small numbers African, Caribbean, African Scottish or Other African ethnic group categories were combined and are here referred to as the ‘African’ group. The ‘Other South Asians’ category includes the Bangladeshi group due to the low numbers of this population resident in Scotland. Travel times were calculated by estimating the off-peak drive time from postcode (zipcode) of patient to postcode of hospital attended or, in case of community death, nearest relevant hospital. Cardiac intervention uptake was defined as having an angioplasty (OPCS 4

1  
2  
3 code K49, K50.1, K75) or coronary artery bypass graft (CABG) (K40 - K46) any time prior  
4  
5 to, or within 28 days of, first AMI.  
6  
7

8  
9 As described previously<sup>14</sup>, we examined the relationship between 8 indicators of  
10 socioeconomic position and all CVD rates. The indicators were: 1) the postcode (zipcode)  
11 based Scottish Index of Multiple Deprivation, 2) car ownership, 3) highest educational  
12 qualification of the individual, 4) highest educational qualification in the household, 5)  
13 National Statistics Socio-economic Classification at individual and 6) household levels, 7)  
14 household tenure and 8) economic activity in the previous week. Individual educational level  
15 was selected as the most consistently associated measure. In every ethnic group the relative  
16 risk for all CVD deaths/hospitalisations for those with a higher qualification compared with  
17 no qualification was less than 1 (mostly about 0.8), and the 95% CI excluded 1 in 8/10 ethnic  
18 groups for men, and 9/10 groups in women. The other seven indicators were less consistent.  
19 Education varied by ethnic group. Education was used in analyses as a proxy for  
20 socioeconomic position (Figure 1a and 1b).  
21  
22  
23  
24  
25  
26  
27  
28  
29  
30  
31  
32  
33  
34  
35  
36  
37

38 The incidence (hospitalisation or death in or out of hospital) of first MI and survival (28-day)  
39 thereafter was compared between ethnic groups. The standard comparison population was the  
40 White Scottish population. We calculated directly standardised rates (DSR) per hundred  
41 thousand per year by sex, and rate ratios; risk ratios (RRs) using Poisson regression with  
42 robust variance<sup>13</sup>; hazard ratios (HR) using Cox regression; and 95% confidence intervals (CI)  
43 around summary measures. We multiplied rate and risk ratios by 100 for simplicity and  
44 presentation so the reference population was 100. The Poisson regression models were chosen  
45 due to their suitability for analysing frequency data, and the independent variables were  
46 selected in advance in order to test our pre-specified hypotheses<sup>13</sup>. The standard reference  
47  
48  
49  
50  
51  
52  
53  
54  
55  
56  
57  
58  
59  
60

1  
2  
3 population was the White Scottish population. We adjusted DSR and rate ratios by age (10  
4  
5 year age groups), and risk ratios also for age and highest education status. No other  
6  
7 confounders were included. We did not test for interaction given lack of power for analyses in  
8  
9 most ethnic groups.  
10

11  
12  
13  
14 Case fatality data were adjusted for cardiac intervention uptake, education and off-peak travel  
15  
16 times to hospital attended using Cox regression. Data were analysed using SAS version 9.  
17  
18

### 19 20 21 **Ethics and disclosure**

22  
23 The work was approved by the Multicentre Research Ethics Committee (for Scotland) and the  
24  
25 Privacy Advisory Committee of NHS National Services Scotland. The ethical and other  
26  
27 permissions and related issues have been reported in detail <sup>7,9</sup>, including an independent  
28  
29 assessment by an ethicist <sup>15</sup>. The analysis was conducted on a standalone computer in a locked  
30  
31 room in the General Register Office for Scotland accessed only by named researchers (HB,  
32  
33 NB, MS). We followed a strict protocol to prevent inadvertent disclosure of personal data  
34  
35 including screening of outputs by an independent committee.  
36  
37  
38  
39

40  
41 For the survival analyses, comparison of age and education adjusted and age adjusted data for  
42  
43 the restricted age cohort for which these data are available (30-74 years) are not shown here to  
44  
45 prevent inadvertent disclosure of identity. For the same reason and due to the minimal effect  
46  
47 of education on the HR's, the final model also excludes education.  
48  
49  
50  
51  
52  
53  
54  
55  
56  
57  
58  
59  
60

## Focus of results

The results text focuses on findings where the 95% confidence interval (CI) for the rate, risk ratio or hazard ratio does not include the reference value of the standard White Scottish comparison population (100 or 1) but the complete dataset is shown in tables.

## Results

### *AMI Incidence of community mortality and hospitalisation mortality/discharge*

There were 85,150 first episodes of AMI in the linked population (n = 2, 972,120) aged  $\geq 30$  years between 2001 and 2008. As expected, the incidence of first AMI was higher for men than women in every age group (10 year categories) (data not shown).

Table 1a and 1b present the number of events, population, DSR and rate ratio with 95% CI by ethnic group for men and women. Table 1a and 1b show that, compared to the White Scottish population, DSR and age adjusted rate ratios were higher in Pakistani men and lower for Other White British, Other White, and Chinese men and women. Indian, Pakistani and Other South Asian populations were substantially different from each other. Amongst men, Pakistanis had the highest rates, followed by Other South Asians and Indians. Amongst women, Other South Asians had the highest rates, however the difference between Indian and Pakistani women was negligible. African men had the same rate as the White Scottish and the rates in the Other Ethnic group and White Irish were also comparable to White Scottish men. White Irish women had similar rates to White Scottish women and the African and Other Ethnic women shared similar rates. The Chinese group had the lowest rates and was the only group where the absolute rates were lower in men than women. Chinese women had similar low rates to Other White British women.

1  
2  
3 Figure 1a and 1b shows that adjustment for education did not remove these differences  
4 (figures restricted to cohort of individuals who have education data, 30-74 years of age). This  
5 adjustment attenuated some, but not all, of the lower risk in the Other White British (from  
6 70.6 to 79.4 in men, and from 61.2 to 69.8 in women) and Other White (from 69.2 to 75.0 in  
7 men, and from 73.6 to 83.1 in women) group. In the Chinese group, adjustment for education  
8 resulted in lower risk ratios (from 36.1 to 33.9 in men, and from 52.6 to 48.5 in women)  
9 increasing the difference relative to the White Scottish. For Pakistani men, there was a slight  
10 attenuation of risk on education adjustment (from 168.2 to 162.2) whereas in Pakistani  
11 women, 20% of the excess was attenuated (from 162.2 to 143.1).  
12  
13  
14  
15  
16  
17  
18  
19  
20  
21  
22  
23  
24

#### 25 ***Cardiac intervention uptake by ethnicity and sex***

26  
27 Less than 1% of interventions occurred prior to MI. There was little ethnic variation in cardiac  
28 intervention rates in this cohort with a slightly higher intervention rate in the Other White  
29 British compared to the White Scottish (Figure 2).  
30  
31  
32  
33  
34  
35

#### 36 ***28 day survival and adjustment for age, travel time, cardiac intervention and education***

37  
38 Table 2a shows that compared to White Scottish males, age adjusted HR's for death within 28  
39 days of AMI were lower for Other White British men. Lower HR in Other White and  
40 Pakistani men are of note but the 95% CI included 1 here. Table 2b shows that Pakistani  
41 women had substantially lower HR compared to White Scottish women. Further adjustment  
42 for hospital travel times, cardiac intervention uptake, and education did not greatly change the  
43 interpretation of the results.  
44  
45  
46  
47  
48  
49  
50  
51  
52  
53  
54  
55  
56  
57  
58  
59  
60

## Discussion

### *Principal findings*

We found sizeable and important ethnic group variations in AMI incidence and survival. These data clearly demonstrate that the high cardiovascular mortality observed in South Asians, especially Pakistanis, mainly reflects increased incidence and not increased case fatality. Our data also demonstrate the reality of the predicted effects of previously reported heterogeneity in cardiovascular risk factors in Indians, Pakistanis and Bangladeshis<sup>11</sup>. The highest rates were seen in Pakistani men, consistent with their pattern of risk factors and their high cardiovascular mortality data based on country of birth from England and Wales. This new analysis demonstrated more marked variations than that shown in country of birth data from Scotland demonstrating the specificity of ethnic group over country of birth<sup>6</sup>. Mortality data based on country of birth have the problem of misclassification error which attenuates associations<sup>16</sup>. We found higher risk in Scottish men and women compared to other non-Scottish White groups, particularly Other White British (mostly English), a difference not removed by adjustment for education. We confirmed previously reported lower rates in Chinese<sup>4,6</sup>. We found no evidence of important ethnic variations in cardiac intervention uptake, pointing to equality of access to these cardiac procedures in Scotland. In comparison to incidence, ethnic differences in survival were small with no evidence of worse outcomes in the Scottish minority ethnic population. The Other White British cardiovascular advantage was also reflected in a slightly lower risk of death 28 days after AMI in men. Contrary to the excess risk of AMI, Pakistani women had much lower risk of dying within 28 days of first AMI.

### *Strengths and limitations of the study*

The strength and limitations of this study have been discussed previously<sup>14</sup>. The strengths include the overall size (4.65 million people), the availability of an ethnic code completed by the householder on behalf of the household or by individuals; information on a wide range of ethnic groups; the linkage of census data to both hospital morbidity and community/hospital mortality so that differences in hospitalisation do not just reflect community mortality<sup>7</sup>; and the linkage of travel time data. Audits show high completeness (99%) and quality (94% diagnostic coding accuracy) of the SMR01 file for CHD diagnoses. All deaths are certified by a doctor in Scotland and all public hospitals are required to submit data. The private hospital sector is small in Scotland. The validity of available indicators of socio-economic position is not yet established in multi-ethnic studies. We have tested 8 indicators and selected the best of these. Our methods were systematic and will be reported in more detail elsewhere<sup>14</sup>. These data break new ground in Europe, both in terms of findings and in linkage methods.

The weaknesses of the study include the small population size for some non-White populations and therefore small number of events and imprecision of estimates as well as aggregation of data for heterogeneous ethnic groups such as African and Caribbean; the inability to capture events that may have occurred outside the UK; the unavailability of data on time to treatment; the unavailability of linkable CVD risk factor data; the unavailability of reliable diabetes data from SMR01 records; and the unavailability of data on AMI stage and severity.

### *Findings in relation to the literature*

The higher hospitalisation/death rates in White Scottish compared to Other White groups are consistent with previous data comparing Scotland to England and Wales<sup>17</sup> and Scottish born

1  
2  
3 people living in England and Wales to those born in England and Wales. Variation in AMI  
4 mortality by socioeconomic deprivation is well established<sup>18;19</sup> and has been demonstrated in  
5 Scotland. How much of Scotland's poorer health is accounted for by socioeconomic and  
6 lifestyle factors has so far been unclear<sup>17</sup>. Consistent with previous data<sup>20</sup>, we found that  
7 education was the socioeconomic factor most consistently associated with cardiovascular risk  
8 in all ethnic groups. Our data shows that the differences in risk between White groups remain  
9 even when education is taken into account.  
10  
11  
12  
13  
14  
15  
16  
17  
18  
19

20 Similarly, differences in risk in non-White groups were not explained by education. The  
21 lower cardiovascular risk in the Chinese is well known and may be attributable in part to  
22 lower risk factors such as smoking and alcohol consumption<sup>21</sup>, lipids and BMI<sup>22</sup>. However,  
23 not all risk factors are lower e.g., Chinese do not have the expected lower glucose intolerance  
24 despite their lower BMI<sup>23</sup> and risk factor data from England show higher prevalence of  
25 diabetes and higher physical inactivity compared to the general population<sup>24</sup>. More study is  
26 required in this group to explore protective factors and to see how incidence changes with  
27 subsequent generations and whether there is an expected convergence with UK rates.  
28  
29  
30  
31  
32  
33  
34  
35  
36  
37  
38  
39

40 Pakistanis, known to be at high cardiovascular risk<sup>4;10</sup>, had a substantially elevated risk  
41 compared to the White Scottish. When differences in education were accounted for,  
42 Pakistanis had 40-60% higher risk of first MI. There has been much study and discussion  
43 exploring the potential role of complex biological and environmental factors and underlying  
44 pathways in the aetiology of the increased cardiovascular disease burden in South Asians.  
45 Whilst the mechanisms underlying the excess risk remain to be elucidated, contrary to earlier  
46 accounts, it is becoming clear that there is both a higher burden of major risk factors and  
47 fewer protective factors<sup>2;11;25;26</sup>. Furthermore, considerable heterogeneity exists between  
48  
49  
50  
51  
52  
53  
54  
55  
56  
57  
58  
59  
60



1  
2  
3 specific South Asian groups (Indian, Pakistanis and Bangladeshis) both in risk factors and  
4  
5 outcomes <sup>4,11</sup>. A higher prevalence of smoking and low HDL is seen in Pakistani men  
6  
7 compared to Indian, and a higher proportion of Pakistanis have been shown to be physically  
8  
9 inactive and from a manual social class compared to Indians in England <sup>24</sup>. Generational  
10  
11 factors may also be important, although this has been less explored. The relatively slow  
12  
13 decline in cardiovascular mortality observed in Pakistani and Bangladeshi migrants in  
14  
15 England and Wales<sup>10</sup> strongly suggests less favourable changes in risk and protective factors,  
16  
17 compared to other ethnic groups resident in England and Wales. Our data showing an excess  
18  
19 of AMI incidence but no lesser cardiac intervention uptake and mortality after AMI in  
20  
21 Pakistanis in Scotland provides evidence for the presence of inequalities in prevention  
22  
23 through identification and management of risk factors. However, inequalities in post MI  
24  
25 clinical management are not evident from our limited data, and information on other forms of  
26  
27 clinical treatment is needed. Our findings are consistent with data from England showing  
28  
29 equitable management of coronary heart disease in deprived groups <sup>27</sup>, and specifically in  
30  
31 South Asian patients <sup>28</sup>.

32  
33  
34  
35  
36  
37  
38 Our findings of better survival in Pakistani women is not unique to Scotland, it corroborates  
39  
40 and adds to our previous analyses<sup>7</sup> and to other studies in South Asians combined <sup>29</sup>.

41  
42 Previous studies have not compared these heterogeneous South Asian groups separately, so  
43  
44 this needs corroboration. Survival from first MI reflects severity and type of MI and access to,  
45  
46 and timing of, treatment, including surgical management. We were unable to compare  
47  
48 severity of MI, complications at presentation, or quality of medical care beyond cardiac  
49  
50 interventions between ethnic groups. It may be that MI's in South Asians, especially Pakistani  
51  
52 women, were less severe but this needs study. Reducing time to treatment reduces mortality  
53  
54  
55  
56  
57  
58  
59  
60  
<sup>30</sup>. We did not have data on time to treatment as previously reported <sup>31</sup> but distance from home

1  
2  
3 to hospital of admission is a potentially important proxy for time to treatment <sup>32</sup>. In our data,  
4  
5 contrary to our hypothesis, adjustment for this proxy did not attenuate Pakistani women's  
6  
7 advantage in survival.  
8  
9

10  
11 Improvements in short term survival following MI have been attributed to both medication  
12  
13 and revascularisation <sup>33</sup>. Some studies have reported ethnic inequalities in intervention uptake  
14  
15 with lower use in South Asians <sup>34</sup>. Notably, Feder et al's study showed major differences in  
16  
17 cardiac intervention in Bangladeshis and Pakistanis. Consistent with data from the Whitehall  
18  
19 study <sup>35</sup> and others <sup>36</sup> we found no evidence of less cardiac intervention in South Asians.  
20  
21  
22  
23

24  
25 Diabetes has shown to contribute to poorer survival after MI in Scottish <sup>37</sup> and South Asian  
26  
27 patients <sup>37;38</sup> and given the known higher prevalence in Indians and Pakistanis, our findings of  
28  
29 survival being no worse after accounting for explanatory factors were unexpected. We were  
30  
31 unable to consider the effect of diabetes in our analysis due to the incompleteness of diabetes  
32  
33 recording in SMR01 datasets but this clearly needs further study.  
34  
35  
36  
37

38  
39 Future work will explore linkage with the Scottish diabetes register and primary care records.  
40  
41 There are no similar studies in other parts of Europe where minority ethnic populations are  
42  
43 larger. There is no easy way of capturing events internationally, but deaths of UK residents  
44  
45 are reported back via several channels, including embassies and consulates, and the primary  
46  
47 care registration systems. Such reports, however, may not give accurate cause of death.  
48  
49  
50

## 51 **Conclusions**

52  
53 The elevated AMI mortality in South Asians in Scotland principally reflects an increased  
54  
55 incidence in Pakistanis. These findings emphasise the need for more aggressive clinical  
56  
57  
58  
59  
60

1  
2  
3 management of modifiable cardiovascular risk factors in this ethnic group. Pakistani women's  
4  
5 lower case fatality was unexplained and not due to closer proximity to hospital or increased  
6  
7 cardiac intervention uptake. Our data provide no evidence for important ethnic disparities in  
8  
9 cardiovascular intervention uptake in Scotland. The disparity in risk between Other White  
10  
11 British and White Scottish is not merely explained by socioeconomic factors reflected by  
12  
13 education. Given the limitations of country of birth data, and of cross-sectional analysis of  
14  
15 mortality data, and the shortage of prospective multi-ethnic cohort studies in Europe <sup>8</sup>, our  
16  
17 retrospective cohort approach using self-defined ethnic group codes provides a promising  
18  
19 approach to describing and understanding ethnic variations in cardiovascular disease. Clinical  
20  
21 care and policy therefore now need to focus on reducing the number of cases through better  
22  
23 prevention.  
24  
25  
26  
27  
28

### 29 **Acknowledgements, Funding and Independence**

30  
31 We thank the Chief Scientist's Office for funding this study (grant (CZH/4/432), and NHS  
32  
33 Health Scotland for a supplementary grant. The Equality and Diversity Information  
34  
35 Programme of the Information Services Division (ISD) of NHS National Services Scotland.  
36  
37 ISD and the General Register Office for Scotland both made 'in-house' contributions to the  
38  
39 work. Joan Jamieson (ISD) was a co-investigator and general adviser. The researchers acted  
40  
41 independently of the funding body and the study sponsor (the University of Edinburgh) at all  
42  
43 stages of the work.  
44  
45  
46  
47  
48  
49

### 50 **Authors' Contributions**

51  
52 Bansal was the lead writer and research fellow and co-ordinator of the study, Bhopal was the  
53  
54 PI and Fischbacher was Co-PI and Chair of Cardiovascular sub-group of SHELS, Brown and  
55  
56 Steiner were the study statistician and data analyst, respectively. Capewell was a collaborator.  
57  
58  
59  
60

1  
2  
3 All authors helped plan the study, evolve analysis plans, interpret data and critically revise  
4  
5 successive drafts of the manuscript.  
6  
7

8  
9  
10 **Competing Interests:** We have no competing interests.

11  
12 All authors have completed the Unified Competing Interest form at  
13  
14 [www.icmje.org/coi\\_disclosure.pdf](http://www.icmje.org/coi_disclosure.pdf) (available on request from the corresponding author) and  
15  
16 declare that (1) all authors have support from their employers for the submitted work; (2)  
17  
18 None have relationships with any companies that might have an interest in the submitted work  
19  
20 in the previous 3 years; (3) their spouses, partners, or children have no financial relationships  
21  
22 that may be relevant to the submitted work; and (4) none have non-financial interests that may  
23  
24 be relevant to the submitted work.  
25  
26  
27  
28  
29  
30

31 **Data Sharing:** No additional data available.  
32  
33  
34  
35

36 **Other Contributors from the Scottish Health and Ethnicity Linkage Study investigators**

37  
38 Chris Povey had the idea of linking the census data to the data held by ISD and he performed  
39  
40 most of the linkage work including developing methods. Jim Chalmers had the original idea  
41  
42 for the use of one-way encryption. Ganka Mueller was key in linking census data to health  
43  
44 data. Ms Genevieve Brin did the analysis of socioeconomic position. David Brewster and  
45  
46 KirstyMacLachlan have advised throughout. These important contributions did not meet  
47  
48 ICMJE authorship requirements. The authorship and note of contributions has been agreed by  
49  
50 all the investigators named.  
51  
52  
53  
54  
55

56 **Guarantor:** Bansal and Bhopal are the guarantors.  
57  
58  
59  
60

## Copyright

The Corresponding Author has the right to grant on behalf of all authors and does grant on behalf of all authors, an exclusive licence (or non exclusive for government employees) on a worldwide basis to the BMJ Publishing Group Ltd and its licensees , to permit this article (if accepted) to be published in BMJ editions and any other BMJPG products and to exploit all subsidiary rights, as set out in our licence (<http://resources.bmj.com/bmj/authors/checklists-forms/licence-for-publication>)

### Figure legends:

Figure 1a: First myocardial infarction age adjusted risk ratios with 95% CI, 01/05/2001-30/04/2008 in people 30-74 yrs, by ethnic group and sex.

Figure 1b: First myocardial infarction age and education adjusted risk ratios with 95% CI, 01/05/2001- 30/04/2008 in people 30-74 yrs, by ethnic group and sex.

Figure 2: Cardiac intervention uptake age adjusted risk ratios with 95% CI by ethnic group.

| Ethnic group         | Events<br>(n) | (n)     | Directly<br>Standardised<br>Rate * |                 | Rate ratio and 95%<br>CI |              |
|----------------------|---------------|---------|------------------------------------|-----------------|--------------------------|--------------|
|                      |               |         | MEN                                | Rate and 95% CI |                          |              |
| White Scottish       | 43498         | 1212686 | 512.4                              | 507.8, 517.1    | 100.0                    |              |
| Other White British  | 3147          | 116076  | 394.9                              | 381.4, 408.3    | 77.1                     | 74.3, 79.8   |
| White Irish          | 569           | 15454   | 477.5                              | 439.5, 515.5    | 93.2                     | 85.7, 100.7  |
| Other White          | 473           | 17335   | 419.0                              | 381.2, 456.8    | 81.8                     | 74.4, 89.2   |
| Any Mixed Background | 45            | 1400    | 658.5                              | 476.0, 841.0    | 128.5                    | 92.9, 164.2  |
| Indian               | 89            | 3125    | 620.9                              | 485.6, 756.3    | 121.2                    | 94.7, 147.6  |
| Pakistani            | 190           | 5354    | 729.5                              | 609.2, 849.9    | 142.4                    | 118.9, 165.9 |
| Other South Asian    | 35            | 1714    | 675.8                              | 446.5, 905.1    | 133.2                    | 82.7, 183.8  |
| African              | 26            | 1746    | 512.4                              | 332.1, 692.7    | 100.0                    | 64.8, 135.2  |
| Chinese              | 27            | 3004    | 230.9                              | 127.5, 334.3    | 45.1                     | 24.9, 65.2   |
| Other Ethnic Group   | 27            | 1848    | 496.9                              | 243.9, 749.9    | 97.0                     | 47.6, 146.4  |

Table 1a. First acute myocardial infarction directly standardised rates and rate ratios (per year, per 100,000) with 95% CI, 01/05/2001 – 30/04/2008 in people  $\geq$  30 yrs, by ethnic group (men) \* Age standardised to White Scottish population

| Ethnic group         | Events<br>(n) | (n)     | Directly<br>Standardised<br>Rate * |              | Rate ratio and 95%<br>CI |             |
|----------------------|---------------|---------|------------------------------------|--------------|--------------------------|-------------|
|                      |               |         | Rate and 95% CI                    |              |                          |             |
| WOMEN                |               |         |                                    |              |                          |             |
| White Scottish       | 33969         | 1408662 | 344.5                              | 340.9, 348.0 | 100.0                    |             |
| Other White British  | 2044          | 127256  | 249.4                              | 238.9, 260.0 | 72.4                     | 69.3, 75.6  |
| White Irish          | 490           | 17927   | 327.2                              | 299.0, 355.4 | 95.0                     | 86.7, 103.2 |
| Other White          | 315           | 21210   | 278.7                              | 248.2, 309.3 | 80.9                     | 72.0, 89.8  |
| Any Mixed Background | 33            | 1849    | 414.0                              | 277.8, 550.2 | 120.2                    | 80.6, 159.7 |
| Indian               | 35            | 2825    | 425.5                              | 277.1, 573.9 | 123.5                    | 80.4, 166.6 |
| Pakistani            | 65            | 4963    | 445.3                              | 306.1, 584.6 | 129.3                    | 88.8, 169.7 |
| Other South Asian    | 23            | 1324    | 526.8                              | 321.6, 732.0 | 153.3                    | 89.4, 217.2 |
| African              | 16            | 1504    | 418.0                              | 209.6, 626.4 | 121.3                    | 60.8, 181.9 |
| Chinese              | 21            | 3250    | 245.6                              | 135.6, 355.6 | 71.3                     | 39.4, 103.2 |
| Other Ethnic Group   | 13            | 2248    | 417.5                              | 197.9, 637.2 | 121.2                    | 57.4, 185.0 |

Table 1b. First acute myocardial infarction directly standardised rates and rate ratios (per year, per 100,000) with 95% CI, 01/05/2001 – 30/04/2008 in people  $\geq$  30 yrs, by ethnic group (women) \* Age standardised to White Scottish population

| Men<br>Ethnic group         | events | N     | Adjusted HR (95% CI) |                   |                    |                                  |
|-----------------------------|--------|-------|----------------------|-------------------|--------------------|----------------------------------|
|                             |        |       | Age                  | Age & Travel time | Age & Intervention | Age, travel time, & intervention |
| <b>White Scottish</b>       | 18730  | 43498 | 1.00                 | 1.00              | 1.00               | 1.00                             |
| <b>Other White British</b>  | 1298   | 3147  | 0.91 (0.86, 0.96)    | 0.92 (0.86,0.98)  | 0.92 (0.87, 0.97)  | 0.92 (0.87, 0.98)                |
| <b>White Irish</b>          | 291    | 569   | 1.12 (1.00, 1.26)    | 1.10 (0.97,1.24)  | 1.11 (0.99, 1.25)  | 1.10 (0.97, 1.24)                |
| <b>Other White</b>          | 202    | 473   | 0.89 (0.77, 1.02)    | 0.91 (0.79, 1.05) | 0.91 (0.79, 1.04)  | 0.93 (0.80, 1.08)                |
| <b>Any Mixed Background</b> | 21     | 45    | 1.08 (0.70, 1.65)    | 1.12 (0.72,1.74)  | 1.01 (0.66, 1.54)  | 1.06 (0.69, 1.65)                |
| <b>Indian</b>               | 32     | 89    | 0.95 (0.67, 1.35)    | 0.96 (0.66,1.38)  | 0.93 (0.66, 1.32)  | 0.95 (0.66, 1.37)                |
| <b>Pakistani</b>            | 51     | 190   | 0.81 (0.61, 1.06)    | 0.86 (0.65,1.15)  | 0.81 (0.62, 1.07)  | 0.87 (0.66, 1.16)                |
| <b>Other South Asian</b>    | 11     | 35    | 0.74 (0.41, 1.33)    | 0.72 (0.38, 1.39) | 0.76 (0.42, 1.36)  | 0.77 (0.40, 1.47)                |
| <b>African</b>              | 12     | 26    | 1.16 (0.66, 2.04)    | 1.17 (0.63, 2.18) | 1.24 (0.70, 2.18)  | 1.27 (0.69, 2.37)                |
| <b>Chinese</b>              | 13     | 27    | 1.32 (0.77, 2.28)    | 0.94 (0.47, 1.89) | 1.45 (0.84, 2.49)  | 1.08 (0.54, 2.17)                |

Table 2a.Hazard ratio for death within 28 days of first MI by ethnic group (Men)



| Women<br>Ethnic group       | events | N     | Adjusted HR (95% CI) |                   |                    |                                 |
|-----------------------------|--------|-------|----------------------|-------------------|--------------------|---------------------------------|
|                             |        |       | Age                  | Age & Travel time | Age & Intervention | Age, travel time & intervention |
| <b>White Scottish</b>       | 17159  | 33969 | 1.00                 | 1.00              | 1.00               | 1.00                            |
| <b>Other White British</b>  | 1032   | 2044  | 0.97 (0.91, 1.03)    | 0.97 (0.91, 1.04) | 0.97 (0.91, 1.03)  | 0.98 (0.91, 1.04)               |
| <b>White Irish</b>          | 265    | 490   | 1.05 (0.93, 1.19)    | 1.07 (0.94, 1.21) | 1.07 (0.94, 1.20)  | 1.08 (0.95, 1.23)               |
| <b>Other White</b>          | 161    | 315   | 1.01 (0.86, 1.17)    | 1.03 (0.88, 1.21) | 1.01 (0.87, 1.18)  | 1.04 (0.89, 1.23)               |
| <b>Any Mixed Background</b> | 16     | 33    | 0.98 (0.60, 1.61)    | 0.96 (0.56, 1.66) | 0.93 (0.57, 1.52)  | 0.92 (0.53, 1.58)               |
| <b>Indian</b>               | 11     | 35    | 0.66 (0.37, 1.19)    | 0.65 (0.35, 1.20) | 0.63 (0.35, 1.13)  | 0.62 (0.33, 1.15)               |
| <b>Pakistani</b>            | 12     | 65    | 0.44 (0.25, 0.78)    | 0.44 (0.24, 0.79) | 0.44 (0.25, 0.78)  | 0.44 (0.25, 0.80)               |
| <b>Other South Asian</b>    | 13     | 23    | 1.19 (0.69, 2.04)    | 1.24 (0.71, 2.19) | 1.15 (0.67, 1.99)  | 1.22 (0.69, 2.14)               |
| <b>African*</b>             | 7      | 16    | 0.91 (0.43, 1.90)    |                   |                    |                                 |
| <b>Chinese*</b>             | 7      | 21    | 0.63 (0.30, 1.31)    |                   |                    |                                 |

Table 2b. Hazard ratio for death within 28 days of first MI by ethnic group (Women)

\*insufficient n to allow further adjustment

## Reference List

- (1) Mackay J, Mensah G. The Atlas of Heart Disease and Stroke. 2004. Geneva, World Health Organization.  
Ref Type: Report
- (2) Anand SS, Yusuf S, Vuksan V, et al. Differences in risk factors, atherosclerosis, and cardiovascular disease between ethnic groups in Canada: the Study of Health Assessment and Risk in Ethnic groups (SHARE). *Lancet* 2000; 356(9226):279-284.
- (3) Yusuf S, Reddy S, Ounpuu S, et al. Global burden of cardiovascular diseases: Part II: variations in cardiovascular disease by specific ethnic groups and geographic regions and prevention strategies. *Circulation* 2001; 104(23):2855-2864.
- (4) Wild SH, Fischbacher C, Brock A, et al. Mortality from all causes and circulatory disease by country of birth in England and Wales 2001-2003. *J Public Health (Oxf)* 2007; 29(2):191-198.
- (5) Reddy KS, Yusuf S. Emerging epidemic of cardiovascular disease in developing countries. *Circulation* 1998; 97(6):596-601.
- (6) Fischbacher CM, Steiner M, Bhopal R, et al. Variations in all cause and cardiovascular mortality by country of birth in Scotland, 1997-2003. *Scott Med J* 2007; 52(4):5-10.
- (7) Fischbacher CM, Bhopal R, Povey C, et al. Record linked retrospective cohort study of 4.6 million people exploring ethnic variations in disease: myocardial infarction in South Asians. *BMC Public Health* 2007; 7:142.
- (8) Rafnsson SB, Bhopal RS. Large-scale epidemiological data on cardiovascular diseases and diabetes in migrant and ethnic minority groups in Europe. *Eur J Public Health* 2009; 19(5):484-491.
- (9) Bhopal R, Fischbacher C, Povey C, et al. Cohort profile: Scottish Health and Ethnicity Linkage Study of 4.65 million people exploring ethnic variations in disease in Scotland. *Int J Epidemiol* 2010.
- (10) Harding S, Rosato M, Teyhan A. Trends for coronary heart disease and stroke mortality among migrants in England and Wales, 1979-2003: slow declines notable for some groups. *Heart* 2008; 94(4):463-470.
- (11) Bhopal R, Unwin N, White M, et al. Heterogeneity of coronary heart disease risk factors in Indian, Pakistani, Bangladeshi, and European origin populations: cross sectional study. *BMJ* 1999; 319(7204):215-220.

- 1  
2  
3 (12) Bhopal R. Spectre of racism in health and health care: lessons from history and the  
4 United States. *BMJ* 1998; 316(7149):1970-1973.  
5  
6 (13) Bhopal RS, Bansal N, Steiner M, et al. Does the Scottish effect apply to all ethnic  
7 groups? All-cancer, lung, colorectal, breast and prostate cancer in the Scottish Health  
8 and Ethnicity Linkage Cohort Study. *BMJ Open* 2012; 2(5).  
9  
10 (14) Bhopal RS, Bansal N, Fischbacher C, et al. Ethnic variations in chest pain and angina  
11 in men and women: Scottish Ethnicity and Health Linkage Study of 4.65 million  
12 people. *Eur J Cardiovasc Prev Rehabil* 2011.  
13  
14 (15) Boyd KM. Ethnicity and the ethics of data linkage. *BMC Public Health* 2007; 7:318.  
15  
16 (16) Gill PS, Kai J, Bhopal R, et al. Health Care Needs Assessment: Black and Minority  
17 Ethnic Groups. The epidemiologically based needs assessment reviews. 2007.  
18 Radcliffe Medical Press Ltd.  
19  
20 Ref Type: Generic  
21  
22 (17) Hanlon P, Lawder RS, Buchanan D, et al. Why is mortality higher in Scotland than in  
23 England and Wales? Decreasing influence of socioeconomic deprivation between  
24 1981 and 2001 supports the existence of a 'Scottish Effect'. *J Public Health (Oxf)*  
25 2005; 27(2):199-204.  
26  
27 (18) Morrison C, Woodward M, Leslie W, et al. Effect of socioeconomic group on  
28 incidence of, management of, and survival after myocardial infarction and coronary  
29 death: analysis of community coronary event register. *BMJ* 1997; 314(7080):541-546.  
30  
31 (19) Capewell S, MacIntyre K, Stewart S, et al. Age, sex, and social trends in out-of-  
32 hospital cardiac deaths in Scotland 1986-95: a retrospective cohort study. *Lancet*  
33 2001; 358(9289):1213-1217.  
34  
35 (20) Kelaher M, Paul S, Lambert H, et al. The applicability of measures of socioeconomic  
36 position to different ethnic groups within the UK. *Int J Equity Health* 2009; 8:4.  
37  
38 (21) White M, Harland JO, Bhopal RS, et al. Smoking and alcohol consumption in a UK  
39 Chinese population. *Public Health* 2001; 115(1):62-69.  
40  
41 (22) Harland JO, Unwin N, Bhopal RS, et al. Low levels of cardiovascular risk factors and  
42 coronary heart disease in a UK Chinese population. *J Epidemiol Community Health*  
43 1997; 51(6):636-642.  
44  
45 (23) Unwin N, Harland J, White M, et al. Body mass index, waist circumference, waist-hip  
46 ratio, and glucose intolerance in Chinese and European adults in Newcastle, UK. *J*  
47 *Epidemiol Community Health* 1997; 51(2):160-166.  
48  
49 (24) Zaninotto P, Mindell J, Hirani V. Prevalence of cardiovascular risk factors among  
50 ethnic groups: results from the Health Surveys for England. *Atherosclerosis* 2007;  
51 195(1):e48-e57.  
52  
53 (25) Cruickshank JK, Cooper J, Burnett M, et al. Ethnic differences in fasting plasma C-  
54 peptide and insulin in relation to glucose tolerance and blood pressure. *Lancet* 1991;  
55 338(8771):842-847.  
56  
57  
58  
59  
60

- 1  
2  
3 (26) Abate N, Chandalia M, Snell PG, et al. Adipose tissue metabolites and insulin  
4 resistance in nondiabetic Asian Indian men. *J Clin Endocrinol Metab* 2004;  
5 89(6):2750-2755.  
6  
7 (27) Bajekal M, Scholes S, Love H, et al. Analysing recent socioeconomic trends in  
8 coronary heart disease mortality in England, 2000-2007: a population modelling study.  
9 *PLoS Med* 2012; 9(6):e1001237.  
10  
11 (28) Zaman MJ, Crook AM, Junghans C, et al. Ethnic differences in long-term  
12 improvement of angina following revascularization or medical management: a  
13 comparison between south Asians and white Europeans. *J Public Health (Oxf)* 2009;  
14 31(1):168-174.  
15  
16 (29) Khan NA, Grubisic M, Hemmelgarn B, et al. Outcomes after acute myocardial  
17 infarction in South Asian, Chinese, and white patients. *Circulation* 2010;  
18 122(16):1570-1577.  
19  
20 (30) Boersma E, Maas AC, Deckers JW, et al. Early thrombolytic treatment in acute  
21 myocardial infarction: reappraisal of the golden hour. *Lancet* 1996; 348(9030):771-  
22 775.  
23  
24 (31) Gupta M, Doobay AV, Singh N, et al. Risk factors, hospital management and  
25 outcomes after acute myocardial infarction in South Asian Canadians and matched  
26 control subjects. *CMAJ* 2002; 166(6):717-722.  
27  
28 (32) Wei L, Lang CC, Sullivan FM, et al. Impact on mortality following first acute  
29 myocardial infarction of distance between home and hospital: cohort study. *Heart*  
30 2008; 94(9):1141-1146.  
31  
32 (33) Briffa T, Hickling S, Knuiman M, et al. Long term survival after evidence based  
33 treatment of acute myocardial infarction and revascularisation: follow-up of  
34 population based Perth MONICA cohort, 1984-2005. *BMJ* 2009; 338:b36.  
35  
36 (34) Sekhri N, Timmis A, Chen R, et al. Inequity of access to investigation and effect on  
37 clinical outcomes: prognostic study of coronary angiography for suspected stable  
38 angina pectoris. *BMJ* 2008; 336(7652):1058-1061.  
39  
40 (35) Britton A, Shipley M, Marmot M, et al. Does access to cardiac investigation and  
41 treatment contribute to social and ethnic differences in coronary heart disease?  
42 Whitehall II prospective cohort study. *BMJ* 2004; 329(7461):318.  
43  
44 (36) Lear JT, Lawrence IG, Pohl JE, et al. Myocardial infarction and thrombolysis: a  
45 comparison of the Indian and European populations on a coronary care unit. *J R Coll*  
46 *Physicians Lond* 1994; 28(2):143-147.  
47  
48 (37) Capewell S, Livingston BM, MacIntyre K, et al. Trends in case-fatality in 117 718  
49 patients admitted with acute myocardial infarction in Scotland. *Eur Heart J* 2000;  
50 21(22):1833-1840.  
51  
52 (38) Wilkinson P, Sayer J, Laji K, et al. Comparison of case fatality in south Asian and  
53 white patients after acute myocardial infarction: observational study. *BMJ* 1996;  
54 312(7042):1330-1333.  
55  
56  
57  
58  
59  
60

1  
2  
3  
4  
5  
6  
7  
8  
9  
10  
11  
12  
13  
14  
15  
16  
17  
18  
19  
20  
21  
22  
23  
24  
25  
26  
27  
28  
29  
30  
31  
32  
33  
34  
35  
36  
37  
38  
39  
40  
41  
42  
43  
44  
45  
46  
47  
48  
49  
50  
51  
52  
53  
54  
55  
56  
57  
58  
59  
60

For peer review only

1  
2  
3  
4  
5  
6  
7  
8  
9  
10  
11  
12  
13  
14  
15  
16  
17  
18  
19  
20  
21  
22  
23  
24  
25  
26  
27  
28  
29  
30  
31  
32  
33  
34  
35  
36  
37  
38  
39  
40  
41  
42  
43  
44  
45  
46  
47  
48  
49  
50  
51  
52  
53  
54  
55  
56  
57  
58  
59  
60

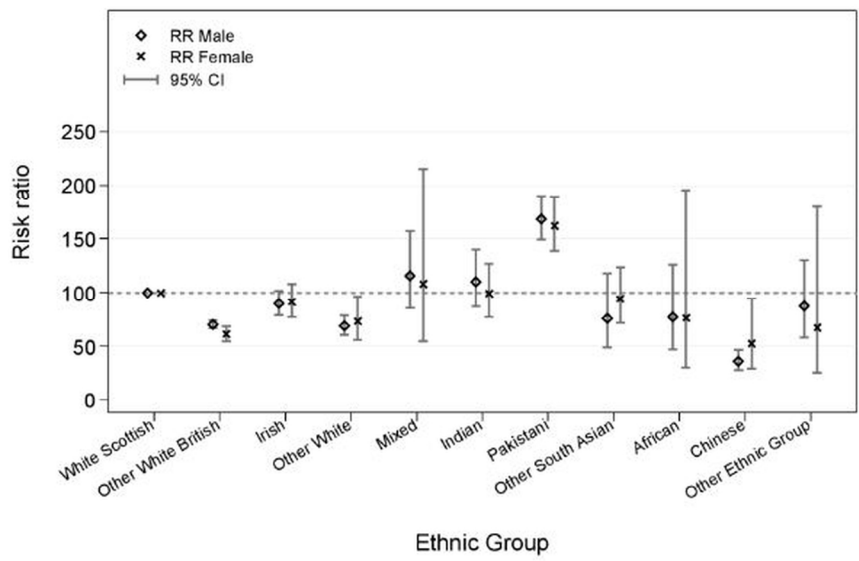

149x90mm (300 x 300 DPI)

Review only

1  
2  
3 **Manuscript title:** Myocardial infarction incidence and survival by ethnic group: Scottish  
4  
5 Health and Ethnicity Linkage retrospective cohort Study  
6  
7

8  
9 **Authors and affiliations:**  
10

11 Narinder Bansal<sup>1</sup>, Colin M Fischbacher<sup>2</sup>, Raj S Bhopal<sup>1</sup>, Helen Brown<sup>1</sup>, Markus FC Steiner<sup>1</sup>,  
12  
13 Simon Capewell<sup>3</sup>, on behalf of the Scottish Health and Ethnicity Linkage Study  
14  
15

16  
17  
18 <sup>1</sup>Public Health Sciences, Centre for Population Health Studies, University of Edinburgh,  
19  
20 Teviot Place, Edinburgh EH8 9AG, Narinder Bansal Research Fellow, Raj S Bhopal Bruce  
21  
22 and John Usher Professor of Public Health, Helen Brown Senior Statistician, Markus FC  
23  
24 Steiner Clinical Research Fellow  
25  
26

27 <sup>2</sup>Information Services Division, NHS Scotland National Services, Gyle Square, 1 South Gyle  
28  
29 Crescent, Edinburgh EH12 9EB, Colin M Fischbacher Public Health Consultant  
30  
31

32 <sup>3</sup>Division of Public Health, University of Liverpool, Whelan Building, Quadrangle,  
33  
34 Liverpool, L69 3GB, Simon Capewell Professor of Clinical Epidemiology  
35  
36  
37

38 **Corresponding to:** Dr Narinder Bansal, [n.bansal@ed.ac.uk](mailto:n.bansal@ed.ac.uk)  
39  
40  
41

42 **Text word count:** 4004  
43  
44  
45  
46  
47  
48  
49  
50  
51  
52  
53  
54  
55  
56  
57  
58  
59  
60

## Abstract

### Objective

Inequalities in coronary heart disease mortality by country of birth are large and poorly understood. However, these data misclassify UK born minority ethnic groups and provide little detail on whether excess risk is due to increased incidence, poorer survival or both.

### Design, setting, patients and main outcome measures

Retrospective cohort study linking the 2001 Census for Scotland and 7 years of death and hospital discharge records. We compared first incidence of, and hazard ratios for death from, first acute myocardial infarction (AMI) by ethnic group.

### Results

AMI incidence risk ratios (95% confidence intervals) relative to White Scottish populations (100) were highest amongst Pakistani men and women (164.1 (142.2 to 189.2) and 153.7 (120.5, 196.1) respectively) and lowest for men and women of Chinese (39.5 (27.1 to 57.6) and 59.1 (38.6 to 90.7)), Other White British (77 (74.2 to 79.8) and 72.2 (69.0 to 75.5)) and Other White (83.1 (75.9 to 91.0) and 79.9 (71.5 to 89.3)) ethnic groups. Adjustment for educational qualification did not remove these differences. Cardiac intervention uptake was similar across most ethnic groups. Compared to the White Scottish, 28-day survival did not differ by ethnicity, except in Pakistanis where it was better, particularly in women (0.44 (0.25 to 0.78)), a difference not removed by adjustment for education, travel time to hospital and cardiac intervention uptake.



## Conclusions

Pakistanis have the highest incidence of AMI in Scotland, a country renowned for internationally high rates of CVD. In contrast, survival is similar or better in minority ethnic groups. Clinical care and policy needs to focus on reducing the number of cases in Pakistanis through more aggressive prevention.

For peer review only

1  
2  
3 Article summary  
4

5 Article focus  
6

- 7 - Expand on and test hypotheses generated by phase 1 work by establishing risk status  
8 for each ethnic group in relation to the White Scottish  
9  
10  
11 - Compare risk of MI incidence between White subgroups (White Scottish with the  
12 Other White British, White Irish and Other White groups) in Scotland  
13  
14  
15 - Assess whether ethnic variations in survival are explained by differences in procedure  
16 use and proximity to hospital  
17  
18  
19

20 Key messages  
21

- 22  
23 • Using ethnicity (rather than its proxy country of birth) reveals exceptionally high rates  
24 of myocardial infarction in Pakistanis in Scotland  
25  
26  
27 • Ethnic variations in incidence and not case fatality underlie these ethnic variations  
28  
29  
30 • Pakistani women in particular have lower MI case fatality than White Scottish women  
31  
32  
33 • Chinese populations had exceptionally low rates of MI  
34  
35  
36 • Scottish men and women have a higher risk of MI compared to other non-Scottish  
37 White groups, particularly Other White British, a difference not removed by  
38 adjustment for education.  
39  
40  
41  
42

43 Strengths and limitations  
44

- 45 - The strengths include the overall size (4.65 million people), the availability of an  
46 ethnic code completed by the householder on behalf of the household or by  
47 individuals; information on a wide range of ethnic groups; the linkage of census data  
48 to both hospital morbidity and community/hospital mortality so that differences in  
49 hospitalisation do not just reflect community mortality; and the linkage of travel time  
50 data. Audits show high completeness (99%) and quality (94% diagnostic coding  
51  
52  
53  
54  
55  
56  
57  
58  
59  
60

1  
2  
3 accuracy) of the SMR01 file for CHD diagnoses. All deaths are certified by a doctor in  
4  
5 Scotland and all public hospitals are required to submit data. The private hospital  
6  
7 sector is small in Scotland. The validity of available indicators of socio-economic  
8  
9 position is not yet established in multi-ethnic studies. These data break new ground in  
10  
11 Europe, both in terms of findings and in linkage methods.  
12  
13

- 14  
15  
16 - The weaknesses of the study include the small population size for some non-White  
17  
18 populations and therefore small number of events and imprecision of estimates as well  
19  
20 as aggregation of data for heterogeneous ethnic groups such as African and Caribbean;  
21  
22 the inability to capture events that may have occurred outside the UK; the  
23  
24 unavailability of linkable CVD risk factor data; the unavailability of reliable diabetes  
25  
26 data from SMR01 records; and the unavailability of data on AMI stage and severity  
27  
28 and time to treatment.  
29  
30  
31  
32  
33  
34  
35  
36  
37  
38  
39  
40  
41  
42  
43  
44  
45  
46  
47  
48  
49  
50  
51  
52  
53  
54  
55  
56  
57  
58  
59  
60

Text

## Introduction

Coronary Heart Disease (CHD) dominates as the leading cause of premature mortality worldwide <sup>1</sup> and has been shown to vary by country of birth in Europe and North America <sup>2,3</sup>. Residents of England and Wales born in the Indian subcontinent (South Asians) for example, have higher mortality from CHD than most other minority ethnic groups, including people of European ancestry <sup>4</sup>, a pattern seen globally <sup>2,3,5</sup>. Such findings are surprising given the high rates of disease in Northern Europe. In Scotland, where CHD is notoriously common, there were small differences in CHD mortality between those born in Scotland and those born in India and Pakistan, reflecting the high rate in the Scotland born reference population <sup>6</sup>. Estimates of ethnic variations in risk are usually based on country of birth and mortality rates. However, the increase in the locally born minority ethnic populations, and the fact that large numbers of older White people may be born abroad e.g., in India during colonial times, makes country of birth an inaccurate guide to ethnic group variations, particularly in the youngest and oldest age groups. Further, whether mortality variations are attributable to increased incidence, poorer survival, or both, is a little researched topic <sup>7</sup>. This is a weakness of most of the available research.

Ethnicity data is needed to determine best treatment strategies and assess the overall health of ethnically diverse populations. Internationally, the need for data on the health of minority ethnic and racial groups is driven by policy and legislation responding to rapidly increasing ethnic diversity <sup>8</sup>. These needs require national datasets covering the major diseases of which circulatory disorders are invariably dominant.

1  
2  
3 Our retrospective Scottish Health and Ethnicity Linkage Study (SHELS) uses linked data to  
4 investigate ethnic variations in health <sup>9</sup>. We reported from a pilot (phase 1) project on the  
5 incidence of hospitalisation or death (in hospital or community) from acute myocardial  
6 infarction (AMI) and subsequent survival (from April 2001 to December 2003) in South  
7 Asians (there were insufficient numbers to disaggregate as Indians, Pakistanis and  
8 Bangladeshis). We found a 45% and 85% higher incidence of AMI in South Asian men and  
9 women, respectively, but better survival (hazard ratio 0.59) compared to non-South Asians <sup>7</sup>.  
10  
11  
12  
13  
14  
15  
16  
17  
18  
19

20 Expanding on our pilot, we now present data from phase 2 of our study on first AMI  
21 incidence and survival comparing ethnic groups in Scotland as defined by the 2001 Scottish  
22 Census categories. The aims of these analyses were to expand on and test hypotheses  
23 generated by phase 1 work by establishing risk status for each ethnic group in relation to the  
24 White Scottish. Particularly, we examined whether the heterogeneity in cardiovascular risk  
25 previously demonstrated within South Asian groups (Indian and Pakistani) <sup>4;10;11</sup> is reflected  
26 in MI incidence and survival in Scotland. Secondly, given that Scottish migrants to England  
27 have comparatively high CHD relative to English born populations, we aimed to compare the  
28 White Scottish with the Other White British, White Irish and Other White groups in Scotland.  
29 Thirdly, we aimed to assess whether ethnic variations in survival are explained by differences  
30 in procedure use and proximity to hospital. Our prior hypotheses were that Indians and  
31 Pakistanis would have the highest, and Chinese the lowest, incidence of first AMI compared  
32 to the White Scottish population and that the better survival in South Asians demonstrated in  
33 phase 1 could be explained by decreased travel time to hospital. In the absence of local data  
34 on uptake of procedures by ethnic groups, we hypothesised from first principles based on  
35 previous research that minority ethnic groups would have a relatively decreased uptake of  
36 cardiac interventions <sup>12</sup>.  
37  
38  
39  
40  
41  
42  
43  
44  
45  
46  
47  
48  
49  
50  
51  
52  
53  
54  
55  
56  
57  
58  
59  
60

## Methods

Details of the methods have been published<sup>7,9,13</sup>. An anonymised dataset containing 2001 census (self-defined ethnicity and socio-demographic variables) and health data (hospital day case and inpatient discharge data and linked records of deaths in and out of hospital) was created using the probability linkage method. This created a file with the unique census identifier and the Scottish Community Health Index number (a national register of patients using the NHS). This file was used to link to hospital discharge/deaths data held in the Scottish Morbidity Record (SMR01) database. Approximately 95% of the 2001 Census population of 4.9 million was linked to health records overall (4.65 million, with 85% or more linked in every ethnic group).

This analysis was restricted to people  $\geq 30$  years of age in April 2001, with a diagnosis of, or death (in or out of hospital) from, AMI between 1<sup>st</sup> May 2001 to 30<sup>th</sup> April 2008, and with no previous AMI recorded in the SMR01 database in the 10 years prior to the index event. AMI was identified using the International Classification of Diseases (ICD) 10<sup>th</sup> edition codes I21 and I22 (and using ICD 9<sup>th</sup> edition code 410 for the look-back period).

One category is selected by Census respondents from a list of 14 categories in response to the question “What is your ethnic group?” The category labels are self-explanatory. Due to small numbers African, Caribbean, African Scottish or Other African ethnic group categories were combined and are here referred to as the ‘African’ group. The ‘Other South Asians’ category includes the Bangladeshi group due to the low numbers of this population resident in Scotland. Travel times were calculated by estimating the off-peak drive time from postcode (zipcode) of patient to postcode of hospital attended or, in case of community death, nearest relevant hospital. Cardiac intervention uptake was defined as having an angioplasty (OPCS 4

code K49, K50.1, K75) or coronary artery bypass graft (CABG) (K40 - K46) any time prior to, or within 28 days of, first AMI.

As described previously<sup>14</sup>, we examined the relationship between 8 indicators of socioeconomic position and all CVD rates. The indicators were: 1) the postcode (zipcode) based Scottish Index of Multiple Deprivation, 2) car ownership, 3) highest educational qualification of the individual, 4) highest educational qualification in the household, 5) National Statistics Socio-economic Classification at individual and 6) household levels, 7) household tenure and 8) economic activity in the previous week. Individual educational level was selected as the most consistently associated measure. In every ethnic group the relative risk for all CVD deaths/hospitalisations for those with a higher qualification compared with no qualification was less than 1 (mostly about 0.8), and the 95% CI excluded 1 in 8/10 ethnic groups for men, and 9/10 groups in women. The other seven indicators were less consistent. Education varied by ethnic group. Education was used in analyses as a proxy for socioeconomic position (Figure 1a and 1b).

The incidence (hospitalisation or death in or out of hospital) of first MI and survival (28-day) thereafter was compared between ethnic groups. The standard comparison population was the White Scottish population. We calculated directly standardised rates (DSR) per hundred thousand per year by sex, and rate ratios; risk ratios (RRs) using Poisson regression with robust variance<sup>13</sup>; hazard ratios (HR) using Cox regression; and 95% confidence intervals (CI) around summary measures. We multiplied rate and risk ratios by 100 for simplicity and presentation so the reference population was 100. The Poisson regression models were chosen due to their suitability for analysing frequency data, and the independent variables were selected in advance in order to test our pre-specified hypotheses<sup>13</sup>. The standard reference

1  
2  
3 population was the White Scottish population. We adjusted DSR and rate ratios by age (10  
4  
5 year age groups), and risk ratios also for age and highest education status. No other  
6  
7 confounders were included. We did not test for interaction given lack of power for analyses in  
8  
9 most ethnic groups.  
10

11  
12  
13  
14 Case fatality data were adjusted for cardiac intervention uptake, education and off-peak travel  
15  
16 times to hospital attended using Cox regression. Data were analysed using SAS version 9.  
17  
18  
19

### 20 21 **Ethics and disclosure**

22  
23 The work was approved by the Multicentre Research Ethics Committee (for Scotland) and the  
24  
25 Privacy Advisory Committee of NHS National Services Scotland. The ethical and other  
26  
27 permissions and related issues have been reported in detail <sup>7,9</sup>, including an independent  
28  
29 assessment by an ethicist <sup>15</sup>. The analysis was conducted on a standalone computer in a locked  
30  
31 room in the General Register Office for Scotland accessed only by named researchers (HB,  
32  
33 NB, MS). We followed a strict protocol to prevent inadvertent disclosure of personal data  
34  
35 including screening of outputs by an independent committee.  
36  
37  
38  
39

40  
41 For the survival analyses, comparison of age and education adjusted and age adjusted data for  
42  
43 the restricted age cohort for which these data are available (30-74 years) are not shown here to  
44  
45 prevent inadvertent disclosure of identity. For the same reason and due to the minimal effect  
46  
47 of education on the HR's, the final model also excludes education.  
48  
49  
50  
51  
52  
53  
54  
55  
56  
57  
58  
59  
60



## Focus of results

The results text focuses on findings where the 95% confidence interval (CI) for the rate, risk ratio or hazard ratio does not include the reference value of the standard White Scottish comparison population (100 or 1) but the complete dataset is shown in tables.

## Results

### *AMI Incidence of community mortality and hospitalisation mortality/discharge*

There were 85,150 first episodes of AMI in the linked population (n = 2, 972,120) aged  $\geq 30$  years between 2001 and 2008. As expected, the incidence of first AMI was higher for men than women in every age group (10 year categories) (data not shown).

Table 1a and 1b present the number of events, population, DSR and rate ratio with 95% CI by ethnic group for men and women. Table 1a and 1b show that, compared to the White Scottish population, DSR and age adjusted rate ratios were higher in Pakistani men and lower for Other White British, Other White, and Chinese men and women. Indian, Pakistani and Other South Asian populations were substantially different from each other. Amongst men, Pakistanis had the highest rates, followed by Other South Asians and Indians. Amongst women, Other South Asians had the highest rates, however the difference between Indian and Pakistani women was negligible. African men had the same rate as the White Scottish and the rates in the Other Ethnic group and White Irish were also comparable to White Scottish men. White Irish women had similar rates to White Scottish women and the African and Other Ethnic women shared similar rates. The Chinese group had the lowest rates and was the only group where the absolute rates were lower in men than women. Chinese women had similar low rates to Other White British women.

1  
2  
3 Figure 1a and 1b shows that adjustment for education did not remove these differences  
4 (figures restricted to cohort of individuals who have education data, 30-74 years of age). This  
5 adjustment attenuated some, but not all, of the lower risk in the Other White British (from  
6 70.6 to 79.4 in men, and from 61.2 to 69.8 in women) and Other White (from 69.2 to 75.0 in  
7 men, and from 73.6 to 83.1 in women) group. In the Chinese group, adjustment for education  
8 resulted in lower risk ratios (from 36.1 to 33.9 in men, and from 52.6 to 48.5 in women)  
9 increasing the difference relative to the White Scottish. For Pakistani men, there was a slight  
10 attenuation of risk on education adjustment (from 168.2 to 162.2) whereas in Pakistani  
11 women, 20% of the excess was attenuated (from 162.2 to 143.1).  
12  
13  
14  
15  
16  
17  
18  
19  
20  
21  
22  
23  
24

#### 25 ***Cardiac intervention uptake by ethnicity and sex***

26  
27 Less than 1% of interventions occurred prior to MI. There was little ethnic variation in cardiac  
28 intervention rates in this cohort with a slightly higher intervention rate in the Other White  
29 British compared to the White Scottish (Figure 2).  
30  
31  
32  
33  
34  
35

#### 36 ***28 day survival and adjustment for age, travel time, cardiac intervention and education***

37  
38 Table 2a shows that compared to White Scottish males, age adjusted HR's for death within 28  
39 days of AMI were lower for Other White British men. Lower HR in Other White and  
40 Pakistani men are of note but the 95% CI included 1 here. Table 2b shows that Pakistani  
41 women had substantially lower HR compared to White Scottish women. Further adjustment  
42 for hospital travel times, cardiac intervention uptake, and education did not greatly change the  
43 interpretation of the results.  
44  
45  
46  
47  
48  
49  
50  
51  
52  
53  
54  
55  
56  
57  
58  
59  
60

## Discussion

### *Principal findings*

We found sizeable and important ethnic group variations in AMI incidence and survival. These data clearly demonstrate that the high cardiovascular mortality observed in South Asians, especially Pakistanis, mainly reflects increased incidence and not increased case fatality. Our data also demonstrate the reality of the predicted effects of previously reported heterogeneity in cardiovascular risk factors in Indians, Pakistanis and Bangladeshis<sup>11</sup>. The highest rates were seen in Pakistani men, consistent with their pattern of risk factors and their high cardiovascular mortality data based on country of birth from England and Wales. This new analysis demonstrated more marked variations than that shown in country of birth data from Scotland demonstrating the specificity of ethnic group over country of birth<sup>6</sup>. Mortality data based on country of birth have the problem of misclassification error which attenuates associations<sup>16</sup>. We found higher risk in Scottish men and women compared to other non-Scottish White groups, particularly Other White British (mostly English), a difference not removed by adjustment for education. We confirmed previously reported lower rates in Chinese<sup>4,6</sup>. We found no evidence of important ethnic variations in cardiac intervention uptake, pointing to equality of access to these cardiac procedures in Scotland. In comparison to incidence, ethnic differences in survival were small with no evidence of worse outcomes in the Scottish minority ethnic population. The Other White British cardiovascular advantage was also reflected in a slightly lower risk of death 28 days after AMI in men. Contrary to the excess risk of AMI, Pakistani women had much lower risk of dying within 28 days of first AMI.

### *Strengths and limitations of the study*

The strength and limitations of this study have been discussed previously<sup>14</sup>. The strengths include the overall size (4.65 million people), the availability of an ethnic code completed by the householder on behalf of the household or by individuals; information on a wide range of ethnic groups; the linkage of census data to both hospital morbidity and community/hospital mortality so that differences in hospitalisation do not just reflect community mortality<sup>7</sup>; and the linkage of travel time data. Audits show high completeness (99%) and quality (94% diagnostic coding accuracy) of the SMR01 file for CHD diagnoses. All deaths are certified by a doctor in Scotland and all public hospitals are required to submit data. The private hospital sector is small in Scotland. The validity of available indicators of socio-economic position is not yet established in multi-ethnic studies. We have tested 8 indicators and selected the best of these. Our methods were systematic and will be reported in more detail elsewhere<sup>14</sup>. These data break new ground in Europe, both in terms of findings and in linkage methods.

The weaknesses of the study include the small population size for some non-White populations and therefore small number of events and imprecision of estimates as well as aggregation of data for heterogeneous ethnic groups such as African and Caribbean; the inability to capture events that may have occurred outside the UK; the unavailability of data on time to treatment; the unavailability of linkable CVD risk factor data; the unavailability of reliable diabetes data from SMR01 records; and the unavailability of data on AMI stage and severity.

### *Findings in relation to the literature*

The higher hospitalisation/death rates in White Scottish compared to Other White groups are consistent with previous data comparing Scotland to England and Wales<sup>17</sup> and Scottish born

1  
2  
3 people living in England and Wales to those born in England and Wales. Variation in AMI  
4 mortality by socioeconomic deprivation is well established<sup>18;19</sup> and has been demonstrated in  
5 Scotland. How much of Scotland's poorer health is accounted for by socioeconomic and  
6 lifestyle factors has so far been unclear<sup>17</sup>. Consistent with previous data<sup>20</sup>, we found that  
7 education was the socioeconomic factor most consistently associated with cardiovascular risk  
8 in all ethnic groups. Our data shows that the differences in risk between White groups remain  
9 even when education is taken into account.  
10  
11

12  
13  
14 Similarly, differences in risk in non-White groups were not explained by education. The  
15 lower cardiovascular risk in the Chinese is well known and may be attributable in part to  
16 lower risk factors such as smoking and alcohol consumption<sup>21</sup>, lipids and BMI<sup>22</sup>. However,  
17 not all risk factors are lower e.g., Chinese do not have the expected lower glucose intolerance  
18 despite their lower BMI<sup>23</sup> and risk factor data from England show higher prevalence of  
19 diabetes and higher physical inactivity compared to the general population<sup>24</sup>. More study is  
20 required in this group to explore protective factors and to see how incidence changes with  
21 subsequent generations and whether there is an expected convergence with UK rates.  
22  
23  
24  
25  
26  
27  
28  
29  
30  
31  
32  
33  
34  
35  
36  
37  
38  
39

40  
41 Pakistanis, known to be at high cardiovascular risk<sup>4;10</sup>, had a substantially elevated risk  
42 compared to the White Scottish. When differences in education were accounted for,  
43 Pakistanis had 40-60% higher risk of first MI. There has been much study and discussion  
44 exploring the potential role of complex biological and environmental factors and underlying  
45 pathways in the aetiology of the increased cardiovascular disease burden in South Asians.  
46 Whilst the mechanisms underlying the excess risk remain to be elucidated, contrary to earlier  
47 accounts, it is becoming clear that there is both a higher burden of major risk factors and  
48 fewer protective factors<sup>2;11;25;26</sup>. Furthermore, considerable heterogeneity exists between  
49  
50  
51  
52  
53  
54  
55  
56  
57  
58  
59  
60

1  
2  
3 specific South Asian groups (Indian, Pakistanis and Bangladeshis) both in risk factors and  
4  
5 outcomes <sup>4,11</sup>. A higher prevalence of smoking and low HDL is seen in Pakistani men  
6  
7 compared to Indian, and a higher proportion of Pakistanis have been shown to be physically  
8  
9 inactive and from a manual social class compared to Indians in England <sup>24</sup>. Generational  
10  
11 factors may also be important, although this has been less explored. The relatively slow  
12  
13 decline in cardiovascular mortality observed in Pakistani and Bangladeshi migrants in  
14  
15 England and Wales<sup>10</sup> strongly suggests less favourable changes in risk and protective factors,  
16  
17 compared to other ethnic groups resident in England and Wales. Our data showing an excess  
18  
19 of AMI incidence but no lesser cardiac intervention uptake and mortality after AMI in  
20  
21 Pakistanis in Scotland provides evidence for the presence of inequalities in prevention  
22  
23 through identification and management of risk factors. However, inequalities in post MI  
24  
25 clinical management are not evident from our limited data, and information on other forms of  
26  
27 clinical treatment is needed. Our findings are consistent with data from England showing  
28  
29 equitable management of coronary heart disease in deprived groups <sup>27</sup>, and specifically in  
30  
31 South Asian patients <sup>28</sup>.

32  
33  
34  
35  
36  
37  
38 Our findings of better survival in Pakistani women is not unique to Scotland, it corroborates  
39  
40 and adds to our previous analyses<sup>7</sup> and to other studies in South Asians combined <sup>29</sup>.

41  
42 Previous studies have not compared these heterogeneous South Asian groups separately, so  
43  
44 this needs corroboration. Survival from first MI reflects severity and type of MI and access to,  
45  
46 and timing of, treatment, including surgical management. We were unable to compare  
47  
48 severity of MI, complications at presentation, or quality of medical care beyond cardiac  
49  
50 interventions between ethnic groups. It may be that MI's in South Asians, especially Pakistani  
51  
52 women, were less severe but this needs study. Reducing time to treatment reduces mortality  
53  
54 <sup>30</sup>. We did not have data on time to treatment as previously reported <sup>31</sup> but distance from home  
55  
56  
57  
58  
59  
60

1  
2  
3 to hospital of admission is a potentially important proxy for time to treatment <sup>32</sup>. In our data,  
4  
5 contrary to our hypothesis, adjustment for this proxy did not attenuate Pakistani women's  
6  
7 advantage in survival.  
8  
9

10  
11 Improvements in short term survival following MI have been attributed to both medication  
12  
13 and revascularisation <sup>33</sup>. Some studies have reported ethnic inequalities in intervention uptake  
14  
15 with lower use in South Asians <sup>34</sup>. Notably, Feder et al's study showed major differences in  
16  
17 cardiac intervention in Bangladeshis and Pakistanis. Consistent with data from the Whitehall  
18  
19 study <sup>35</sup> and others <sup>36</sup> we found no evidence of less cardiac intervention in South Asians.  
20  
21  
22

23  
24  
25 Diabetes has shown to contribute to poorer survival after MI in Scottish <sup>37</sup> and South Asian  
26  
27 patients <sup>37;38</sup> and given the known higher prevalence in Indians and Pakistanis, our findings of  
28  
29 survival being no worse after accounting for explanatory factors were unexpected. We were  
30  
31 unable to consider the effect of diabetes in our analysis due to the incompleteness of diabetes  
32  
33 recording in SMR01 datasets but this clearly needs further study.  
34  
35  
36

37  
38  
39 Future work will explore linkage with the Scottish diabetes register and primary care records.  
40  
41 There are no similar studies in other parts of Europe where minority ethnic populations are  
42  
43 larger. There is no easy way of capturing events internationally, but deaths of UK residents  
44  
45 are reported back via several channels, including embassies and consulates, and the primary  
46  
47 care registration systems. Such reports, however, may not give accurate cause of death.  
48  
49  
50

## 51 **Conclusions**

52  
53  
54 The elevated AMI mortality in South Asians in Scotland principally reflects an increased  
55  
56 incidence in Pakistanis. These findings emphasise the need for more aggressive clinical  
57  
58  
59  
60

1  
2  
3 management of modifiable cardiovascular risk factors in this ethnic group. Pakistani women's  
4  
5 lower case fatality was unexplained and not due to closer proximity to hospital or increased  
6  
7 cardiac intervention uptake. Our data provide no evidence for important ethnic disparities in  
8  
9 cardiovascular intervention uptake in Scotland. The disparity in risk between Other White  
10  
11 British and White Scottish is not merely explained by socioeconomic factors reflected by  
12  
13 education. Given the limitations of country of birth data, and of cross-sectional analysis of  
14  
15 mortality data, and the shortage of prospective multi-ethnic cohort studies in Europe <sup>8</sup>, our  
16  
17 retrospective cohort approach using self-defined ethnic group codes provides a promising  
18  
19 approach to describing and understanding ethnic variations in cardiovascular disease. Clinical  
20  
21 care and policy therefore now need to focus on reducing the number of cases through better  
22  
23 prevention.  
24  
25  
26  
27  
28

### 29 **Acknowledgements, Funding and Independence**

30  
31 We thank the Chief Scientist's Office for funding this study (grant (CZH/4/432), and NHS  
32  
33 Health Scotland for a supplementary grant. The Equality and Diversity Information  
34  
35 Programme of the Information Services Division (ISD) of NHS National Services Scotland.  
36  
37 ISD and the General Register Office for Scotland both made 'in-house' contributions to the  
38  
39 work. Joan Jamieson (ISD) was a co-investigator and general adviser. The researchers acted  
40  
41 independently of the funding body and the study sponsor (the University of Edinburgh) at all  
42  
43 stages of the work.  
44  
45  
46  
47  
48  
49

### 50 **Authors' Contributions**

51  
52 Bansal was the lead writer and research fellow and co-ordinator of the study, Bhopal was the  
53  
54 PI and Fischbacher was Co-PI and Chair of Cardiovascular sub-group of SHELS, Brown and  
55  
56 Steiner were the study statistician and data analyst, respectively. Capewell was a collaborator.  
57  
58  
59  
60



1  
2  
3 All authors helped plan the study, evolve analysis plans, interpret data and critically revise  
4  
5 successive drafts of the manuscript.  
6  
7  
8

9  
10 **Other Contributors from the Scottish Health and Ethnicity Linkage Study investigators**

11  
12 Chris Povey had the idea of linking the census data to the data held by ISD and he performed  
13  
14 most of the linkage work including developing methods. Jim Chalmers had the original idea  
15  
16 for the use of one-way encryption. Ganka Mueller was key in linking census data to health  
17  
18 data. Ms Genevieve Brin did the analysis of socioeconomic position. David Brewster and  
19  
20 KirstyMacLachlan have advised throughout. These important contributions did not meet  
21  
22 ICMJE authorship requirements. The authorship and note of contributions has been agreed by  
23  
24 all the investigators named.  
25  
26  
27  
28  
29

30 **Guarantor:** Bansal and Bhopal are the guarantors.  
31

32  
33 **Copyright**

34  
35 The Corresponding Author has the right to grant on behalf of all authors and does grant on  
36  
37 behalf of all authors, an exclusive licence (or non exclusive for government employees) on a  
38  
39 worldwide basis to the BMJ Publishing Group Ltd and its licensees , to permit this article (if  
40  
41 accepted) to be published in BMJ editions and any other BMJPG products and to exploit all  
42  
43 subsidiary rights, as set out in our licence ([http://resources.bmj.com/bmj/authors/checklists-](http://resources.bmj.com/bmj/authors/checklists-forms/licence-for-publication)  
44  
45 [forms/licence-for-publication](http://resources.bmj.com/bmj/authors/checklists-forms/licence-for-publication)  
46  
47  
48  
49  
50  
51

52 **Competing Interests:** We have no competing interests.  
53

54  
55 All authors have completed the Unified Competing Interest form at  
56  
57 [www.icmje.org/coi\\_disclosure.pdf](http://www.icmje.org/coi_disclosure.pdf) (available on request from the corresponding author) and  
58  
59  
60

1  
2  
3 declare that (1) all authors have support from their employers for the submitted work; (2)  
4  
5 None have relationships with any companies that might have an interest in the submitted work  
6  
7 in the previous 3 years; (3) their spouses, partners, or children have no financial relationships  
8  
9 that may be relevant to the submitted work; and (4) none have non-financial interests that may  
10  
11 be relevant to the submitted work.  
12  
13  
14  
15  
16  
17  
18  
19  
20  
21  
22  
23  
24  
25  
26  
27  
28  
29  
30  
31  
32  
33  
34  
35  
36  
37  
38  
39  
40  
41  
42  
43  
44  
45  
46  
47  
48  
49  
50  
51  
52  
53  
54  
55  
56  
57  
58  
59  
60

For peer review only

| Ethnic group<br>MEN  | Events<br>(n) | (n)     | Directly<br>Standardised<br>Rate * |              | Rate ratio and 95%<br>CI |              |
|----------------------|---------------|---------|------------------------------------|--------------|--------------------------|--------------|
|                      |               |         | Rate and 95% CI                    |              |                          |              |
| White Scottish       | 43498         | 1212686 | 512.4                              | 507.8, 517.1 | 100.0                    |              |
| Other White British  | 3147          | 116076  | 394.9                              | 381.4, 408.3 | 77.1                     | 74.3, 79.8   |
| White Irish          | 569           | 15454   | 477.5                              | 439.5, 515.5 | 93.2                     | 85.7, 100.7  |
| Other White          | 473           | 17335   | 419.0                              | 381.2, 456.8 | 81.8                     | 74.4, 89.2   |
| Any Mixed Background | 45            | 1400    | 658.5                              | 476.0, 841.0 | 128.5                    | 92.9, 164.2  |
| Indian               | 89            | 3125    | 620.9                              | 485.6, 756.3 | 121.2                    | 94.7, 147.6  |
| Pakistani            | 190           | 5354    | 729.5                              | 609.2, 849.9 | 142.4                    | 118.9, 165.9 |
| Other South Asian    | 35            | 1714    | 675.8                              | 446.5, 905.1 | 133.2                    | 82.7, 183.8  |
| African              | 26            | 1746    | 512.4                              | 332.1, 692.7 | 100.0                    | 64.8, 135.2  |
| Chinese              | 27            | 3004    | 230.9                              | 127.5, 334.3 | 45.1                     | 24.9, 65.2   |
| Other Ethnic Group   | 27            | 1848    | 496.9                              | 243.9, 749.9 | 97.0                     | 47.6, 146.4  |

Table 1a. First acute myocardial infarction directly standardised rates and rate ratios (per year, per 100,000) with 95% CI, 01/05/2001 – 30/04/2008 in people  $\geq$  30 yrs, by ethnic group (men) \*Age standardised to White Scottish population

| Ethnic group         | Events<br>(n) | (n)     | Directly<br>Standardised<br>Rate * |              | Rate ratio and 95%<br>CI |             |
|----------------------|---------------|---------|------------------------------------|--------------|--------------------------|-------------|
|                      |               |         | Rate and 95% CI                    |              |                          |             |
| WOMEN                |               |         |                                    |              |                          |             |
| White Scottish       | 33969         | 1408662 | 344.5                              | 340.9, 348.0 | 100.0                    |             |
| Other White British  | 2044          | 127256  | 249.4                              | 238.9, 260.0 | 72.4                     | 69.3, 75.6  |
| White Irish          | 490           | 17927   | 327.2                              | 299.0, 355.4 | 95.0                     | 86.7, 103.2 |
| Other White          | 315           | 21210   | 278.7                              | 248.2, 309.3 | 80.9                     | 72.0, 89.8  |
| Any Mixed Background | 33            | 1849    | 414.0                              | 277.8, 550.2 | 120.2                    | 80.6, 159.7 |
| Indian               | 35            | 2825    | 425.5                              | 277.1, 573.9 | 123.5                    | 80.4, 166.6 |
| Pakistani            | 65            | 4963    | 445.3                              | 306.1, 584.6 | 129.3                    | 88.8, 169.7 |
| Other South Asian    | 23            | 1324    | 526.8                              | 321.6, 732.0 | 153.3                    | 89.4, 217.2 |
| African              | 16            | 1504    | 418.0                              | 209.6, 626.4 | 121.3                    | 60.8, 181.9 |
| Chinese              | 21            | 3250    | 245.6                              | 135.6, 355.6 | 71.3                     | 39.4, 103.2 |
| Other Ethnic Group   | 13            | 2248    | 417.5                              | 197.9, 637.2 | 121.2                    | 57.4, 185.0 |

Table 1b. First acute myocardial infarction directly standardised rates and rate ratios (per year, per 100,000) with 95% CI, 01/05/2001 – 30/04/2008 in people  $\geq$  30 yrs, by ethnic group (women) \* Age standardised to White Scottish population

| Men<br>Ethnic group         | events | N     | Adjusted HR (95% CI) |                   |                    |                                  |
|-----------------------------|--------|-------|----------------------|-------------------|--------------------|----------------------------------|
|                             |        |       | Age                  | Age & Travel time | Age & Intervention | Age, travel time, & intervention |
| <b>White Scottish</b>       | 18730  | 43498 | 1.00                 | 1.00              | 1.00               | 1.00                             |
| <b>Other White British</b>  | 1298   | 3147  | 0.91 (0.86, 0.96)    | 0.92 (0.86,0.98)  | 0.92 (0.87, 0.97)  | 0.92 (0.87, 0.98)                |
| <b>White Irish</b>          | 291    | 569   | 1.12 (1.00, 1.26)    | 1.10 (0.97,1.24)  | 1.11 (0.99, 1.25)  | 1.10 (0.97, 1.24)                |
| <b>Other White</b>          | 202    | 473   | 0.89 (0.77, 1.02)    | 0.91 (0.79, 1.05) | 0.91 (0.79, 1.04)  | 0.93 (0.80, 1.08)                |
| <b>Any Mixed Background</b> | 21     | 45    | 1.08 (0.70, 1.65)    | 1.12 (0.72,1.74)  | 1.01 (0.66, 1.54)  | 1.06 (0.69, 1.65)                |
| <b>Indian</b>               | 32     | 89    | 0.95 (0.67, 1.35)    | 0.96 (0.66,1.38)  | 0.93 (0.66, 1.32)  | 0.95 (0.66, 1.37)                |
| <b>Pakistani</b>            | 51     | 190   | 0.81 (0.61, 1.06)    | 0.86 (0.65,1.15)  | 0.81 (0.62, 1.07)  | 0.87 (0.66, 1.16)                |
| <b>Other South Asian</b>    | 11     | 35    | 0.74 (0.41, 1.33)    | 0.72 (0.38, 1.39) | 0.76 (0.42, 1.36)  | 0.77 (0.40, 1.47)                |
| <b>African</b>              | 12     | 26    | 1.16 (0.66, 2.04)    | 1.17 (0.63, 2.18) | 1.24 (0.70, 2.18)  | 1.27 (0.69, 2.37)                |
| <b>Chinese</b>              | 13     | 27    | 1.32 (0.77, 2.28)    | 0.94 (0.47, 1.89) | 1.45 (0.84, 2.49)  | 1.08 (0.54, 2.17)                |

Table 2a. Hazard ratio for death within 28 days of first MI by ethnic group (Men)

| Women<br>Ethnic group | events | N     | Adjusted HR (95% CI) |                   |                    |                                 |
|-----------------------|--------|-------|----------------------|-------------------|--------------------|---------------------------------|
|                       |        |       | Age                  | Age & Travel time | Age & Intervention | Age, travel time & intervention |
| White Scottish        | 17159  | 33969 | 1.00                 | 1.00              | 1.00               | 1.00                            |
| Other White British   | 1032   | 2044  | 0.97 (0.91, 1.03)    | 0.97 (0.91, 1.04) | 0.97 (0.91, 1.03)  | 0.98 (0.91, 1.04)               |
| White Irish           | 265    | 490   | 1.05 (0.93, 1.19)    | 1.07 (0.94, 1.21) | 1.07 (0.94, 1.20)  | 1.08 (0.95, 1.23)               |
| Other White           | 161    | 315   | 1.01 (0.86, 1.17)    | 1.03 (0.88, 1.21) | 1.01 (0.87, 1.18)  | 1.04 (0.89, 1.23)               |
| Any Mixed Background  | 16     | 33    | 0.98 (0.60, 1.61)    | 0.96 (0.56, 1.66) | 0.93 (0.57, 1.52)  | 0.92 (0.53, 1.58)               |
| Indian                | 11     | 35    | 0.66 (0.37, 1.19)    | 0.65 (0.35, 1.20) | 0.63 (0.35, 1.13)  | 0.62 (0.33, 1.15)               |
| Pakistani             | 12     | 65    | 0.44 (0.25, 0.78)    | 0.44 (0.24, 0.79) | 0.44 (0.25, 0.78)  | 0.44 (0.25, 0.80)               |
| Other South Asian     | 13     | 23    | 1.19 (0.69, 2.04)    | 1.24 (0.71, 2.19) | 1.15 (0.67, 1.99)  | 1.22 (0.69, 2.14)               |
| African*              | 7      | 16    | 0.91 (0.43, 1.90)    |                   |                    |                                 |
| Chinese*              | 7      | 21    | 0.63 (0.30, 1.31)    |                   |                    |                                 |

Table 2b. Hazard ratio for death within 28 days of first MI by ethnic group (Women)

\*insufficient n to allow further adjustment

## Reference List

- (1) Mackay J, Mensah G. **The Atlas of Heart Disease and Stroke. 2004. Geneva, World Health Organization.**  
Ref Type: Report
- (2) Anand SS, Yusuf S, Vuksan V, Devanese S, Teo KK, Montague PA et al. **Differences in risk factors, atherosclerosis, and cardiovascular disease between ethnic groups in Canada: the Study of Health Assessment and Risk in Ethnic groups (SHARE). *Lancet* 2000; 356(9226):279-284.**
- (3) Yusuf S, Reddy S, Ounpuu S, Anand S. **Global burden of cardiovascular diseases: Part II: variations in cardiovascular disease by specific ethnic groups and geographic regions and prevention strategies. *Circulation* 2001; 104(23):2855-2864.**
- (4) Wild SH, Fischbacher C, Brock A, Griffiths C, Bhopal R. **Mortality from all causes and circulatory disease by country of birth in England and Wales 2001-2003. *J Public Health (Oxf)* 2007; 29(2):191-198.**
- (5) Reddy KS, Yusuf S. **Emerging epidemic of cardiovascular disease in developing countries. *Circulation* 1998; 97(6):596-601.**
- (6) Fischbacher CM, Steiner M, Bhopal R, Chalmers J, Jamieson J, Knowles D et al. **Variations in all cause and cardiovascular mortality by country of birth in Scotland, 1997-2003. *Scott Med J* 2007; 52(4):5-10.**
- (7) Fischbacher CM, Bhopal R, Povey C, Steiner M, Chalmers J, Mueller G et al. **Record linked retrospective cohort study of 4.6 million people exploring ethnic variations in disease: myocardial infarction in South Asians. *BMC Public Health* 2007; 7:142.**
- (8) Rafnsson SB, Bhopal RS. **Large-scale epidemiological data on cardiovascular diseases and diabetes in migrant and ethnic minority groups in Europe. *Eur J Public Health* 2009; 19(5):484-491.**
- (9) Bhopal R, Fischbacher C, Povey C, Chalmers J, Mueller G, Steiner M et al. **Cohort profile: Scottish Health and Ethnicity Linkage Study of 4.65 million people exploring ethnic variations in disease in Scotland. *Int J Epidemiol* 2010.**
- (10) Harding S, Rosato M, Teyhan A. **Trends for coronary heart disease and stroke mortality among migrants in England and Wales, 1979-2003: slow declines notable for some groups. *Heart* 2008; 94(4):463-470.**

- 1  
2  
3 (11) Bhopal R, Unwin N, White M, Yallop J, Walker L, Alberti KG et al.  
4 Heterogeneity of coronary heart disease risk factors in Indian, Pakistani,  
5 Bangladeshi, and European origin populations: cross sectional study. *BMJ* 1999;  
6 319(7204):215-220.  
7  
8 (12) Bhopal R. Spectre of racism in health and health care: lessons from history and  
9 the United States. *BMJ* 1998; 316(7149):1970-1973.  
10  
11 (13) Bhopal RS, Bansal N, Steiner M, Brewster DH. Does the Scottish effect apply to  
12 all ethnic groups? All-cancer, lung, colorectal, breast and prostate cancer in the  
13 Scottish Health and Ethnicity Linkage Cohort Study. *BMJ Open* 2012; 2(5).  
14  
15 (14) Bhopal RS, Bansal N, Fischbacher C, Brown H, Capewell S. Ethnic variations in  
16 chest pain and angina in men and women: Scottish Ethnicity and Health Linkage  
17 Study of 4.65 million people. *Eur J Cardiovasc Prev Rehabil* 2011.  
18  
19 (15) Boyd KM. Ethnicity and the ethics of data linkage. *BMC Public Health* 2007;  
20 7:318.  
21  
22 (16) Gill PS, Kai J, Bhopal R, Wild S. Health Care Needs Assessment: Black and  
23 Minority Ethnic Groups. The epidemiologically based needs assessment reviews.  
24 2007. Radcliffe Medical Press Ltd.

25  
26 Ref Type: Generic

- 27  
28 (17) Hanlon P, Lawder RS, Buchanan D, Redpath A, Walsh D, Wood R et al. Why is  
29 mortality higher in Scotland than in England and Wales? Decreasing influence of  
30 socioeconomic deprivation between 1981 and 2001 supports the existence of a  
31 'Scottish Effect'. *J Public Health (Oxf)* 2005; 27(2):199-204.  
32  
33 (18) Morrison C, Woodward M, Leslie W, Tunstall-Pedoe H. Effect of socioeconomic  
34 group on incidence of, management of, and survival after myocardial infarction  
35 and coronary death: analysis of community coronary event register. *BMJ* 1997;  
36 314(7080):541-546.  
37  
38 (19) Capewell S, MacIntyre K, Stewart S, Chalmers JW, Boyd J, Finlayson A et al.  
39 Age, sex, and social trends in out-of-hospital cardiac deaths in Scotland 1986-95:  
40 a retrospective cohort study. *Lancet* 2001; 358(9289):1213-1217.  
41  
42 (20) Kelaher M, Paul S, Lambert H, Ahmad W, Smith GD. The applicability of  
43 measures of socioeconomic position to different ethnic groups within the UK. *Int*  
44 *J Equity Health* 2009; 8:4.  
45  
46 (21) White M, Harland JO, Bhopal RS, Unwin N, Alberti KG. Smoking and alcohol  
47 consumption in a UK Chinese population. *Public Health* 2001; 115(1):62-69.  
48  
49 (22) Harland JO, Unwin N, Bhopal RS, White M, Watson B, Laker M et al. Low  
50 levels of cardiovascular risk factors and coronary heart disease in a UK Chinese  
51 population. *J Epidemiol Community Health* 1997; 51(6):636-642.  
52  
53 (23) Unwin N, Harland J, White M, Bhopal R, Winocour P, Stephenson P et al. Body  
54 mass index, waist circumference, waist-hip ratio, and glucose intolerance in  
55  
56  
57  
58  
59  
60



- 1  
2  
3 Chinese and European adults in Newcastle, UK. *J Epidemiol Community Health*  
4 1997; 51(2):160-166.
- 5  
6 (24) Zaninotto P, Mindell J, Hirani V. Prevalence of cardiovascular risk factors  
7 among ethnic groups: results from the Health Surveys for England.  
8 *Atherosclerosis* 2007; 195(1):e48-e57.
- 9  
10 (25) Cruickshank JK, Cooper J, Burnett M, MacDuff J, Drubra U. Ethnic differences  
11 in fasting plasma C-peptide and insulin in relation to glucose tolerance and blood  
12 pressure. *Lancet* 1991; 338(8771):842-847.
- 13  
14 (26) Abate N, Chandalia M, Snell PG, Grundy SM. Adipose tissue metabolites and  
15 insulin resistance in nondiabetic Asian Indian men. *J Clin Endocrinol Metab*  
16 2004; 89(6):2750-2755.
- 17  
18 (27) Bajekal M, Scholes S, Love H, Hawkins N, O'Flaherty M, Raine R et al.  
19 Analysing recent socioeconomic trends in coronary heart disease mortality in  
20 England, 2000-2007: a population modelling study. *PLoS Med* 2012;  
21 9(6):e1001237.
- 22  
23 (28) Zaman MJ, Crook AM, Junghans C, Fitzpatrick NK, Feder G, Timmis AD et al.  
24 Ethnic differences in long-term improvement of angina following  
25 revascularization or medical management: a comparison between south Asians  
26 and white Europeans. *J Public Health (Oxf)* 2009; 31(1):168-174.
- 27  
28 (29) Khan NA, Grubisic M, Hemmelgarn B, Humphries K, King KM, Quan H.  
29 Outcomes after acute myocardial infarction in South Asian, Chinese, and white  
30 patients. *Circulation* 2010; 122(16):1570-1577.
- 31  
32 (30) Boersma E, Maas AC, Deckers JW, Simoons ML. Early thrombolytic treatment  
33 in acute myocardial infarction: reappraisal of the golden hour. *Lancet* 1996;  
34 348(9030):771-775.
- 35  
36 (31) Gupta M, Doobay AV, Singh N, Anand SS, Raja F, Mawji F et al. Risk factors,  
37 hospital management and outcomes after acute myocardial infarction in South  
38 Asian Canadians and matched control subjects. *CMAJ* 2002; 166(6):717-722.
- 39  
40 (32) Wei L, Lang CC, Sullivan FM, Boyle P, Wang J, Pringle SD et al. Impact on  
41 mortality following first acute myocardial infarction of distance between home  
42 and hospital: cohort study. *Heart* 2008; 94(9):1141-1146.
- 43  
44 (33) Briffa T, Hickling S, Knuiman M, Hobbs M, Hung J, Sanfilippo FM et al. Long  
45 term survival after evidence based treatment of acute myocardial infarction and  
46 revascularisation: follow-up of population based Perth MONICA cohort, 1984-  
47 2005. *BMJ* 2009; 338:b36.
- 48  
49 (34) Sekhri N, Timmis A, Chen R, Junghans C, Walsh N, Zaman MJ et al. Inequity of  
50 access to investigation and effect on clinical outcomes: prognostic study of  
51 coronary angiography for suspected stable angina pectoris. *BMJ* 2008;  
52 336(7652):1058-1061.
- 53  
54  
55  
56  
57  
58  
59  
60

- 1  
2  
3 (35) Britton A, Shipley M, Marmot M, Hemingway H. Does access to cardiac  
4 investigation and treatment contribute to social and ethnic differences in  
5 coronary heart disease? Whitehall II prospective cohort study. *BMJ* 2004;  
6 329(7461):318.  
7  
8 (36) Lear JT, Lawrence IG, Pohl JE, Burden AC. Myocardial infarction and  
9 thrombolysis: a comparison of the Indian and European populations on a  
10 coronary care unit. *J R Coll Physicians Lond* 1994; 28(2):143-147.  
11  
12 (37) Capewell S, Livingston BM, MacIntyre K, Chalmers JW, Boyd J, Finlayson A et  
13 al. Trends in case-fatality in 117 718 patients admitted with acute myocardial  
14 infarction in Scotland. *Eur Heart J* 2000; 21(22):1833-1840.  
15  
16 (38) Wilkinson P, Sayer J, Laji K, Grundy C, Marchant B, Kopelman P et al.  
17 Comparison of case fatality in south Asian and white patients after acute  
18 myocardial infarction: observational study. *BMJ* 1996; 312(7042):1330-1333.  
19  
20  
21  
22  
23  
24  
25  
26  
27  
28  
29  
30  
31  
32  
33  
34  
35  
36  
37  
38  
39  
40  
41  
42  
43  
44  
45  
46  
47  
48  
49  
50  
51  
52  
53  
54  
55  
56  
57  
58  
59  
60

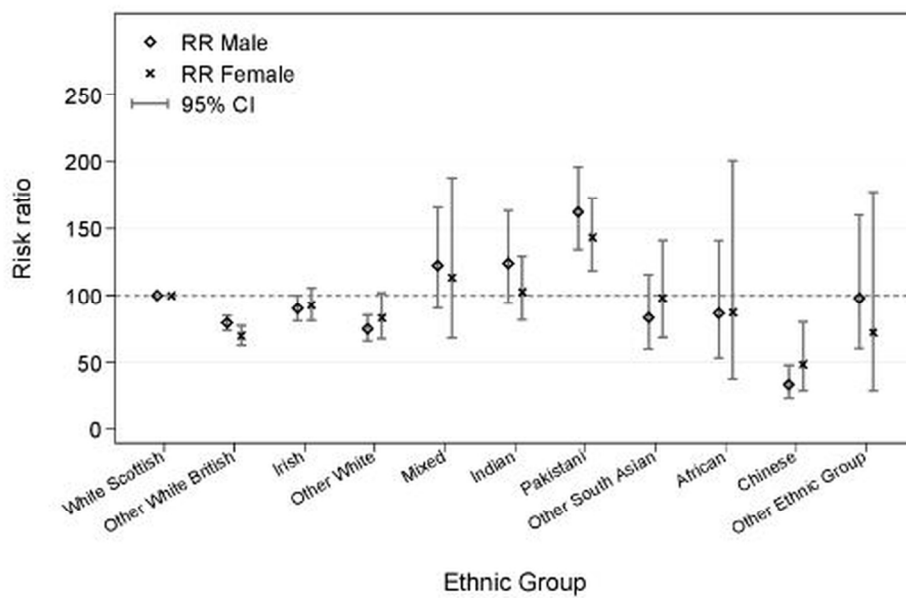

144x90mm (300 x 300 DPI)

Review only

1  
2  
3  
4  
5  
6  
7  
8  
9  
10  
11  
12  
13  
14  
15  
16  
17  
18  
19  
20  
21  
22  
23  
24  
25  
26  
27  
28  
29  
30  
31  
32  
33  
34  
35  
36  
37  
38  
39  
40  
41  
42  
43  
44  
45  
46  
47  
48  
49  
50  
51  
52  
53  
54  
55  
56  
57  
58  
59  
60

1  
2  
3  
4  
5  
6  
7  
8  
9  
10  
11  
12  
13  
14  
15  
16  
17  
18  
19  
20  
21  
22  
23  
24  
25  
26  
27  
28  
29  
30  
31  
32  
33  
34  
35  
36  
37  
38  
39  
40  
41  
42  
43  
44  
45  
46  
47  
48  
49  
50  
51  
52  
53  
54  
55  
56  
57  
58  
59  
60

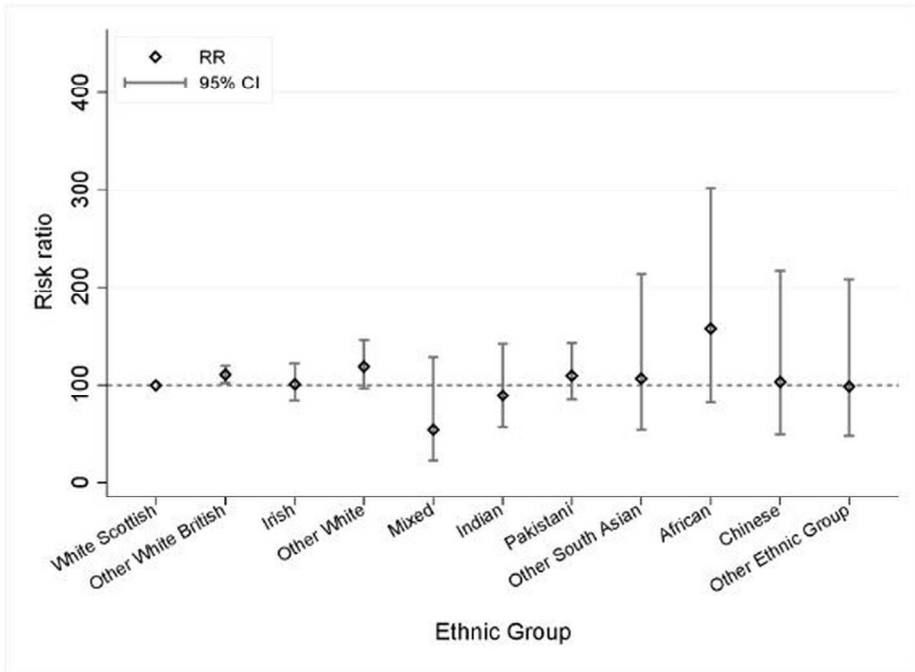

126x90mm (300 x 300 DPI)

View only
